# Supplementary material for: Multiple major disease-associated clones of Legionella pneumophila have emerged recently and independently
Source: PubMed Central journal article supplement (PMC5088597; doi:10.1101/gr.209536.116), 2016-11

### A (ST1)

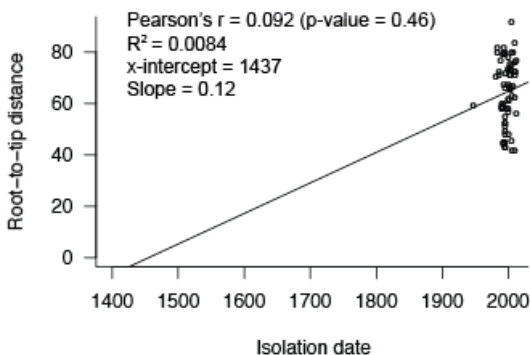

### B (ST23)

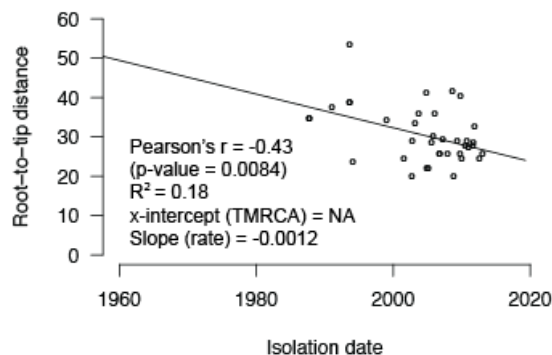

### C (ST37)

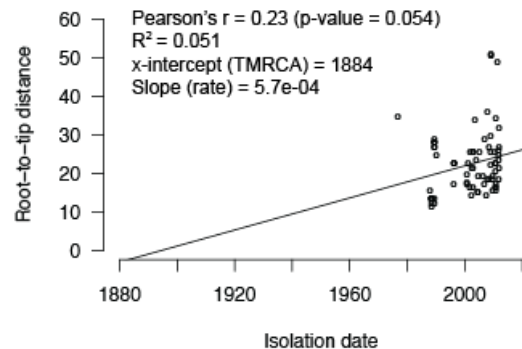

### D (ST47)

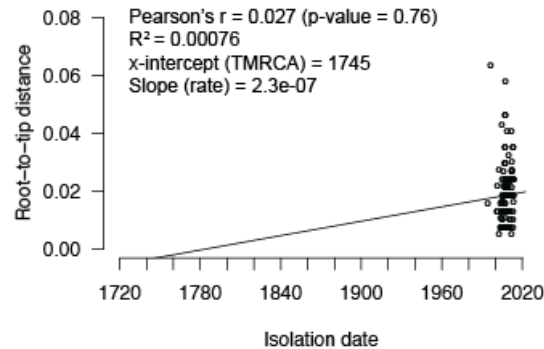

### E (ST62)

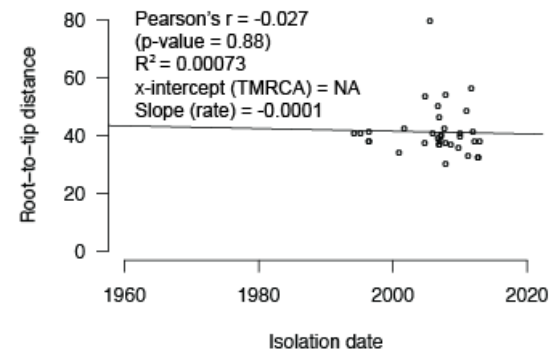

Supplement: supp_gr.209536.116_Supplemental_Fig_S2.pdf [file supp_gr.209536.116_Supplemental_Fig_S2.pdf]
