# Supplementary material for: Multiple major disease-associated clones of Legionella pneumophila have emerged recently and independently
Source: PubMed Central journal article supplement (PMC5088597; doi:10.1101/gr.209536.116), 2016-11

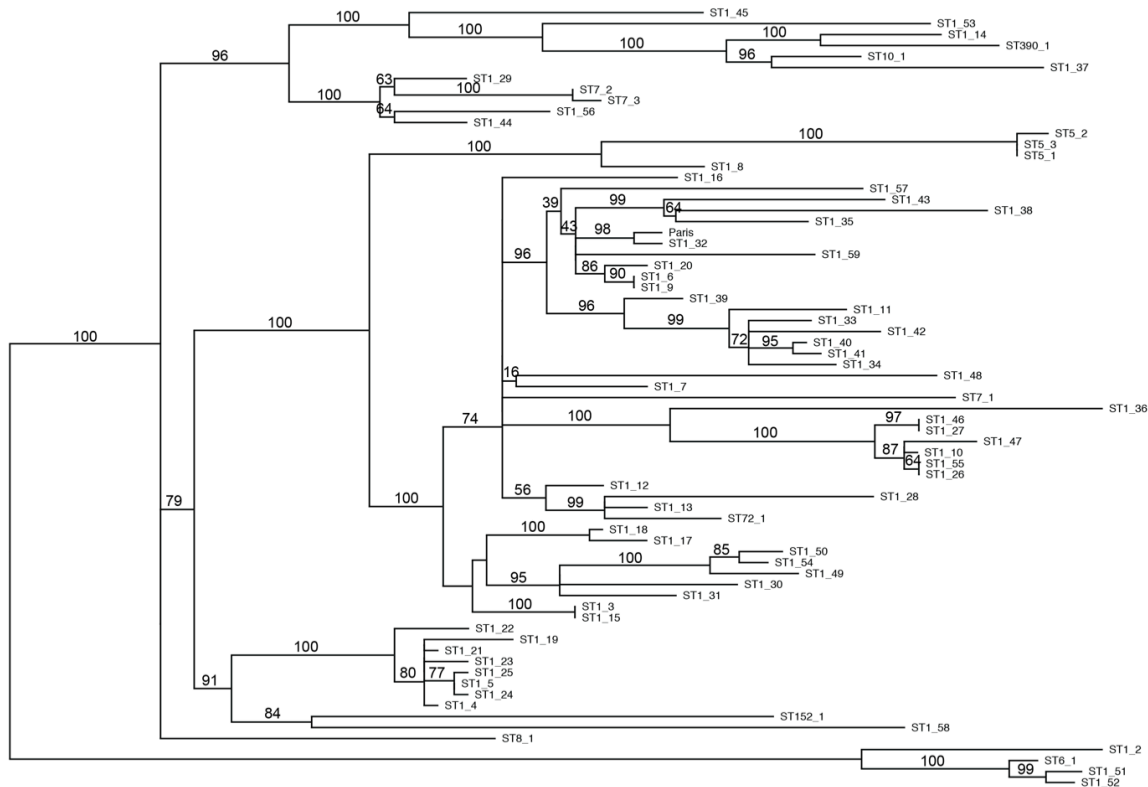

Supplement: supp_gr.209536.116_Supplemental_Fig_S3.pdf [file supp_gr.209536.116_Supplemental_Fig_S3.pdf]
