# Supplementary material for: Multiple major disease-associated clones of Legionella pneumophila have emerged recently and independently
Source: Genome Res. 2016 Nov;26(11):1555–64. doi: 10.1101/gr.209536.116 (PMC5088597; doi:10.1101/gr.209536.116)
Supplement: Supplemental Material [file supp_gr.209536.116_Supplemental_Table_S5.xlsx]

## Sheet: Affected taxa
Table S5. Highlighted recombined regions in the SynTView representation of the ST1 lineage.
Region 1	Region 2	Region 3	Region 4	Region 5	Region 6	Region 7	Region 8	Region 9	Region 10	Region 11	Region 12	Region 13	Region 14
EUL00093	LG09404015	L3415-03	HL04163014	L3415-03	LG11181044	EUL00093	L3415-03	EUL00093	EUL00021	HL04163014	HL07013004	LG11181044	EUL00093
EUL00088	HL03111005	L3386-03	EUL00108	L3386-03	EUL00119	EUL00088	L3386-03	EUL00088	LT40-04	EUL00108	EUL00046	EUL00119	EUL00088
EUL00094	LG10191002		LP21		LG10143009	EUL00094		EUL00094	EUL00044	LP21		LG10143009	EUL00094
EUL00082	HL02304015		EUL00109		LG11391124	EUL00082		EUL00082	EUL00037	EUL00109		LG11391124	EUL00082
EUL00095	EUL00042		LP23		L3415-03	EUL00095		EUL00095	EUL00043	LP23			EUL00095
EUL00085	LG11011012				L3386-03	EUL00085		EUL00085	LG09404015	LG11181044		HL07013004	EUL00085
EUL00084	LG10203012				HL07013004	EUL00084		EUL00084	HL03111005	EUL00119		EUL00046	EUL00084
					EUL00046				LG10191002	LG10143009
					EUL00093				HL02304015	LG11391124
					EUL00088				EUL00042	L3415-03
					EUL00094				LG11011012	L3386-03
					EUL00082				LG10203012	HL07013004
					EUL00095				HL04163014	EUL00046
					EUL00085				EUL00108	EUL00093
					EUL00084				LP21	EUL00088
					NIIB225				EUL00109	EUL00094
					NIIB223				LP23	EUL00082
									LG11181044	EUL00095
									EUL00119	EUL00085
									LG10143009	EUL00084
									LG11391124
									L3415-03
									L3386-03
									HL07013004
									EUL00046
									EUL00093
									EUL00088
									EUL00094
									EUL00082
									EUL00095
									EUL00085
									EUL00084
									NIIB225
									NIIB223
									EUL00067
									EUL00062
									EUL00058
									EUL00055

## Sheet: Region 1
Genome position	Strand	#of aminoacids	Gene name	Gene Identifier	COG#	Annotation
194054..194923	+	289	lvrA	lpp0166	-	hypothetical protein
194865..195251	+	128	lvrB	lpp0167	-	hypothetical protein
195264..195467	+	67	lvrC	lpp0168	COG1551T	hypothetical protein
195464..195766	+	100	lvhB2	lpp0169	COG3838U	hypothetical protein
195776..196057	+	93	lvhB3	lpp0170	COG3702U	hypothetical protein
196044..198524	+	826	lvhB4	lpp0171	COG3451U	hypothetical protein
198521..199231	+	236	lvhB5	lpp0172	-	hypothetical protein
199246..199392	+	48	lvhB7	lpp0173	-	hypothetical protein
199389..199784	+	131	lvrD	lpp0174	-	hypothetical protein
199788..200828	+	346	lvhB6	lpp0175	COG3704U	hypothetical protein
200825..201541	+	238	lvhB8	lpp0176	COG3736U	hypothetical protein
201538..202290	+	250	lvhB9	lpp0177	COG3504U	hypothetical protein
202287..203378	+	363	lvhB10	lpp0178	COG2948U	hypothetical protein
203380..204384	+	334	lvhB11	lpp0179	COG4962U	hypothetical protein
204377..206278	+	633	lvhD4	lpp0180	COG3505U	hypothetical protein
206376..207173	+	265	lvrE	lpp0181	-	hypothetical protein
207419..208168	+	249	-	lpp0182	-	hypothetical protein
208292..210931	-	879	-	lpp0183	COG0507L	hypothetical protein
211180..211386	+	68	-	lpp0184	-	hypothetical protein
211373..211642	+	89	-	lpp0185	-	hypothetical protein
211736..212383	+	215	-	lpp0186	-	hypothetical protein
212387..213196	+	269	-	lpp0187	COG2333R	hypothetical protein
213223..213684	-	153	-	lpp0188	COG0590FJ	hypothetical protein
213677..215104	-	475	-	lpp0189	COG1738S	hypothetical protein
215097..215456	-	119	-	lpp0190	-	hypothetical protein
215473..216120	-	215	-	lpp0191	COG3093R	hypothetical protein
216289..216528	+	79	-	lpp0192	-	hypothetical protein
216559..216765	+	68	-	lpp0193	-	hypothetical protein
216714..217922	+	402	-	lpp0194	COG4974L	hypothetical protein
218149..218973	+	274	-	lpp0195	COG5340K	hypothetical protein
218960..219922	+	320	-	lpp0196	COG2253S	hypothetical protein

## Sheet: Region 2
Genome position	Strand	#of aminoacids	Gene name	Gene Identifier	COG#	Annotation
392717..393586	+	289	-	lpp0348	COG0583K	hypothetical protein
393998..397348	+	1116	sdbA	lpp0349	-	SdbA protein, substrate of the Dot/Icm
397428..398981	+	517	-	lpp0350	-	hypothetical protein
399047..399712	-	221	-	lpp0351	COG2200T	hypothetical protein
399749..401272	-	507	-	lpp0352	COG2199T	hypothetical protein
401275..402690	-	471	-	lpp0353	COG4191T	hypothetical protein
402713..403876	-	387	-	lpp0354	COG3287S	hypothetical protein
404049..404930	-	293	-	lpp0355	COG0583K	hypothetical protein
405129..407048	+	639	-	lpp0356	-	hypothetical protein
407059..408243	-	394	-	lpp0357	COG1113E	hypothetical protein
408311..409087	-	258	-	lpp0358	COG2226H	hypothetical protein
409295..410506	+	403	-	lpp0359	COG1052CHR	formate dehydrogenase
410611..411735	-	374	-	lpp0360	-	hypothetical protein
411972..412655	+	227	-	lpp0361	-	hypothetical protein
412760..413533	+	257	-	lpp0362	COG4221R	hypothetical protein
413777..414136	+	119	-	lpp0363	-	hypothetical protein
414759..414989	+	76	-	lpp0364	-	hypothetical protein
415044..415613	-	189	efp	lpp0365	COG0231J	elongation factor P
415685..416665	+	326	-	lpp0366	COG1509E	hypothetical protein
416734..418806	-	690	ppk	lpp0367	COG0855P	polyphosphate kinase
418847..420052	-	401	-	lpp0368	COG1752R	hypothetical protein
420128..420661	-	177	-	lpp0369	COG2059P	hypothetical protein

## Sheet: Region 3
Genome position	Strand	#of aminoacids	Gene name	Gene Identifier	COG#	Annotation
471562..472320	+	252	-	lpp0423	COG1028IQR	enoyl-ACP reductase
472391..472804	+	137	-	lpp0424	COG0236IQ	hypothetical protein
472804..473700	+	298	-	lpp0425	COG0764I	hypothetical protein
473705..474997	+	430	-	lpp0426	COG0304IQ	hypothetical protein
474998..476275	+	425	-	lpp0427	COG0304IQ	hypothetical protein
476268..477113	+	281	-	lpp0428	COG1560M	hypothetical protein
477223..477528	-	101	-	lpp0429	-	hypothetical protein
477704..480394	-	896	-	lpp0430	-	hypothetical protein
480705..481538	-	277	dapF	lpp0431	COG0253E	diaminopimelate epimerase
481548..481676	-	42	-	lpp0432	COG5567N	hypothetical protein
481835..482212	-	125	-	lpp0433	-	hypothetical protein
482375..483034	+	219	-	lpp0434	COG0400R	hypothetical protein
483031..483465	+	144	-	lpp0435	COG2867I	hypothetical protein
483452..483724	+	90	-	lpp0436	COG2914S	hypothetical protein
483812..484126	-	104	-	lpp0437	COG2913J	hypothetical protein
484354..484764	+	136	fur	lpp0438	COG0735P	ferric uptake
485188..486258	+	356	-	lpp0440	COG2199T	hypothetical protein
486569..486955	-	128	-	lpp0441	-	hypothetical protein
487212..487811	+	199	-	lpp0442	-	hypothetical protein

## Sheet: Region 4
Genome position	Strand	#of aminoacids	Gene name	Gene Identifier	COG#	Annotation
876968..879733	-	921	valS	lpp0785	COG0525J	valyl-tRNA synthetase
879992..883039	-	1015	-	lpp0786	COG0841V	hypothetical protein
883156..884418	-	420	-	lpp0787	COG0845M	hypothetical protein
884659..885063	+	134	-	lpp0788	-	hypothetical protein
885129..885566	+	145	-	lpp0789	-	hypothetical protein
885691..886002	+	103	-	lpp0790	COG2823R	hypothetical protein
886030..887283	+	417	glyA	lpp0791	COG0112E	serine hydroxymethyltransferase
887286..887753	+	155	nrdR	lpp0792	COG1327K	transcriptional regulator NrdR
887811..888254	+	147	nusB	lpp0793	COG0781K	hypothetical protein
888247..889203	+	318	thiL	lpp0794	COG0611H	thiamine-monophosphate kinase
889293..889775	+	160	pgpA	lpp0795	COG1267I	phosphatidylglycerophosphatase A
889775..890827	+	350	-	lpp0796	COG0628R	hypothetical protein
914155..914796	+	213	hisH	lpp0816	COG0118E	imidazole glycerol phosphate synthase subunit HisH
914809..915507	+	232	neuA	lpp0817	COG1083M	CMP-N-acetlyneuraminic acid synthetase
915504..916526	+	340	neuB	lpp0818	COG2089M	N-acetylneuraminic acid condensing enzyme
916526..917659	+	377	neuC	lpp0819	COG0381M	N-acylglucosamine 2-epimerase
917649..918257	+	202	-	lpp0820	COG1045E	hypothetical protein
918268..919770	+	500	-	lpp0821	COG0399M	hypothetical protein
919860..920423	+	187	rmlC	lpp0822	COG1898M	dTDP-4-dehydrorhamnose 3,5-epimerase
920424..921308	+	294	rmlD	lpp0823	COG1091M	dTDP-4-keto-L-rhamnose reductase
921268..922347	+	359	rmlB	lpp0824	COG1088M	dTDP-D-glucose 4,6-dehydratase
922386..923885	+	499	gpi	lpp0825	COG0166G	glucose-6-phosphate isomerase
924040..924915	+	291	rmlA	lpp0826	COG1209M	glucose-1-phosphate thymidylyltransferase
924936..925892	+	318	-	lpp0827	COG0451MG	hypothetical protein
925876..926880	+	334	wecA	lpp0828	COG0472M	alpha-N-acetylglucosaminyltransferase
928337..930133	-	598	-	lpp0830	-	hypothetical protein

## Sheet: Region 5
Genome position	Strand	#of aminoacids	Gene name	Gene Identifier	COG#	Annotation
888247..889203	+	318	thiL	lpp0794	COG0611H	thiamine-monophosphate kinase
889293..889775	+	160	pgpA	lpp0795	COG1267I	phosphatidylglycerophosphatase A
889775..890827	+	350	-	lpp0796	COG0628R	hypothetical protein
890819..891556	-	245	-	lpp0797	-	hypothetical protein
891566..892204	-	212	-	lpp0798	COG3637M	hypothetical protein
892394..893818	+	474	-	lpp0799	-	hypothetical protein
893870..895480	-	536	-	lpp0800	COG0171H	hypothetical protein
895764..899030	+	1088	-	lpp0801	COG0553KL	hypothetical protein
899289..899723	+	144	-	lpp0802	COG4731S	hypothetical protein
899901..901283	+	460	dnaB	lpp0803	COG0305L	replicative DNA helicase
901285..902358	+	357	-	lpp0804	COG0787M	hypothetical protein
902431..902880	+	149	-	lpp0805	COG4520M	hypothetical protein
903188..903622	+	144	-	lpp0806	COG2905T	hypothetical protein
903731..904918	+	395	-	lpp0807	COG0695O	hypothetical protein
905030..905326	+	98	-	lpp0808	COG3369S	hypothetical protein
905323..906873	+	516	-	lpp0809	COG2199T	hypothetical protein
907025..908014	+	329	lipA	lpp0810	COG0320H	lipoyl synthase
909490..910998	-	502	iraB	lpp0812	COG3104E	di/tripeptide transporter homolog IraB
911037..911855	-	272	iraA	lpp0813	COG2226H	small-molecule methyltransferase IraA
912015..913397	+	460	-	lpp0814	COG0037D	hypothetical protein
913397..914158	+	253	hisF	lpp0815	COG0107E	hypothetical protein
914155..914796	+	213	hisH	lpp0816	COG0118E	imidazole glycerol phosphate synthase subunit HisH
914809..915507	+	232	neuA	lpp0817	COG1083M	CMP-N-acetlyneuraminic acid synthetase
915504..916526	+	340	neuB	lpp0818	COG2089M	N-acetylneuraminic acid condensing enzyme
916526..917659	+	377	neuC	lpp0819	COG0381M	N-acylglucosamine 2-epimerase
917649..918257	+	202	-	lpp0820	COG1045E	hypothetical protein
918268..919770	+	500	-	lpp0821	COG0399M	hypothetical protein
919860..920423	+	187	rmlC	lpp0822	COG1898M	dTDP-4-dehydrorhamnose 3,5-epimerase
920424..921308	+	294	rmlD	lpp0823	COG1091M	dTDP-4-keto-L-rhamnose reductase
921268..922347	+	359	rmlB	lpp0824	COG1088M	dTDP-D-glucose 4,6-dehydratase
922386..923885	+	499	gpi	lpp0825	COG0166G	glucose-6-phosphate isomerase
924040..924915	+	291	rmlA	lpp0826	COG1209M	glucose-1-phosphate thymidylyltransferase
924936..925892	+	318	-	lpp0827	COG0451MG	hypothetical protein
925876..926880	+	334	wecA	lpp0828	COG0472M	alpha-N-acetylglucosaminyltransferase
928337..930133	-	598	-	lpp0830	-	hypothetical protein
930136..931254	-	372	-	lpp0831	-	hypothetical protein
931265..932266	-	333	-	lpp0832	COG2334R	hypothetical protein
932256..933347	-	363	-	lpp0833	COG2089M	hypothetical protein
933360..934079	-	239	-	lpp0834	COG2226H	hypothetical protein
934395..935912	+	505	-	lpp0835	COG0381M	hypothetical protein
936145..937827	+	560	-	lpp0836	-	hypothetical protein
937793..938644	+	283	wzm	lpp0837	COG1682GM	ABC transporter of LPS O-antigen, Wzm
938641..940065	+	474	wzt	lpp0838	COG1134GM	ABC transporter of LPS O-antigen, Wzt
940071..941219	+	382	-	lpp0839	-	hypothetical protein
941233..942123	-	296	-	lpp0840	COG1216R	hypothetical protein
942904..943977	+	357	lag-1	lpp0841	COG1835I	O-acetyltransferase
944090..944983	-	297	-	lpp0842	COG1216R	hypothetical protein
944977..945996	-	339	-	lpp0843	COG1216R	hypothetical protein
946208..946915	+	235	-	lpp0844	COG0491R	hypothetical protein
947474..947668	+	64	csrA	lpp0845	COG1551T	carbon storage regulator
947794..949776	-	660	-	lpp0846	COG1835I	hypothetical protein
949939..950934	-	331	birA	lpp0847	COG0340H	biotin-[acetylCoA carboxylase] holoenzyme synthetase and biotin
950938..951675	-	245	-	lpp0848	COG2091H	hypothetical protein
951757..952710	+	317	accA	lpp0849	COG0825I	acetyl-CoA carboxylase carboxyltransferase subunit alpha
952703..953998	+	431	-	lpp0850	COG0037D	hypothetical protein
954348..954884	+	178	-	lpp0851	COG1943L	hypothetical protein
964909..966252	-	447	nadA	lpp0861	COG0379H	quinolinate synthetase
966327..967976	-	549	nadB	lpp0862	COG0029H	L-aspartate oxidase
967973..969343	-	456	purB	lpp0863	COG0015F	adenylosuccinate lyase
969496..971199	+	567	-	lpp0864	COG0659P	hypothetical protein
971402..973105	-	567	-	lpp0865	COG1960I	hypothetical protein
973335..974333	-	332	-	lpp0866	COG3049M	hypothetical protein
974558..976945	+	795	ppsA	lpp0867	COG0574G	phosphoenolpyruvate synthase
977187..978626	+	479	-	lpp0868	COG0475P	hypothetical protein
978623..979465	+	280	nadC	lpp0869	COG0157H	nicotinate-nucleotide pyrophosphorylase
979462..980553	+	363	murG	lpp0870	COG0707M	undecaprenyldiphospho-muramoylpentapeptide beta-N- acetylglucosaminyltransferase
980528..981943	+	471	-	lpp0871	COG0624E	hypothetical protein
982035..982352	+	105	-	lpp0872	COG1555L	hypothetical protein
982548..983585	+	345	mreB	lpp0873	COG1077D	rod shape-determining protein MreB
983563..984471	+	302	mreC	lpp0874	COG1792M	rod shape-determining protein MreC
984468..984947	+	159	mreD	lpp0875	COG2891M	rod shape-determining protein MreD
984883..985485	-	200	-	lpp0876	COG1187J	hypothetical protein
985746..986444	+	232	-	lpp0877	-	hypothetical protein
986554..987810	+	418	icd	lpp0878	COG0538C	isocitrate dehydrogenase
988212..988547	+	111	clpS	lpp0879	COG2127S	ATP-dependent Clp protease adaptor protein ClpS
988579..990846	+	755	clpA	lpp0880	COG0542O	ATP-dependent Clp protease ATP-binding subunit ClpA

## Sheet: Region 6
Genome position	Strand	#of aminoacids	Gene name	Gene Identifier	COG#	Annotation
895764..899030	+	1088	-	lpp0801	COG0553KL	hypothetical protein
899289..899723	+	144	-	lpp0802	COG4731S	hypothetical protein
899901..901283	+	460	dnaB	lpp0803	COG0305L	replicative DNA helicase
901285..902358	+	357	-	lpp0804	COG0787M	hypothetical protein
902431..902880	+	149	-	lpp0805	COG4520M	hypothetical protein
903188..903622	+	144	-	lpp0806	COG2905T	hypothetical protein
903731..904918	+	395	-	lpp0807	COG0695O	hypothetical protein
905030..905326	+	98	-	lpp0808	COG3369S	hypothetical protein
905323..906873	+	516	-	lpp0809	COG2199T	hypothetical protein
907025..908014	+	329	lipA	lpp0810	COG0320H	lipoyl synthase
908326..908607	-	93	-	lpp0811	COG2827L	hypothetical protein
909490..910998	-	502	iraB	lpp0812	COG3104E	di/tripeptide transporter homolog IraB
911037..911855	-	272	iraA	lpp0813	COG2226H	small-molecule methyltransferase IraA
912015..913397	+	460	-	lpp0814	COG0037D	hypothetical protein
913397..914158	+	253	hisF	lpp0815	COG0107E	hypothetical protein
914155..914796	+	213	hisH	lpp0816	COG0118E	imidazole glycerol phosphate synthase subunit HisH
914809..915507	+	232	neuA	lpp0817	COG1083M	CMP-N-acetlyneuramini acid synthetase
915504..916526	+	340	neuB	lpp0818	COG2089M	N-acetylneuramini acid condensing enzyme
916526..917659	+	377	neuC	lpp0819	COG0381M	N-acylglucosamine 2-epimerase
917649..918257	+	202	-	lpp0820	COG1045E	hypothetical protein
918268..919770	+	500	-	lpp0821	COG0399M	hypothetical protein
919860..920423	+	187	rmlC	lpp0822	COG1898M	dTDP-4-dehydrorhamnose 3,5-epimerase
920424..921308	+	294	rmlD	lpp0823	COG1091M	TDP-4-keto-L-rhamnos reductase
921268..922347	+	359	rmlB	lpp0824	COG1088M	dTDP-D-glucose 4,6-dehydratase
922386..923885	+	499	gpi	lpp0825	COG0166G	glucose-6-phosphate isomerase
924040..924915	+	291	rmlA	lpp0826	COG1209M	glucose-1-phosphat thymidylyltransferase
924936..925892	+	318	-	lpp0827	COG0451MG	hypothetical protein
925876..926880	+	334	wecA	lpp0828	COG0472M	alpha-N-acetylglucosaminyltransferase
928337..930133	-	598	-	lpp0830	-	hypothetical protein
930136..931254	-	372	-	lpp0831	-	hypothetical protein
931265..932266	-	333	-	lpp0832	COG2334R	hypothetical protein
932256..933347	-	363	-	lpp0833	COG2089M	hypothetical protein
933360..934079	-	239	-	lpp0834	COG2226H	hypothetical protein
934395..935912	+	505	-	lpp0835	COG0381M	hypothetical protein
936145..937827	+	560	-	lpp0836	-	hypothetical protein
937793..938644	+	283	wzm	lpp0837	COG1682GM	ABC transporter of LPS O-antigen, Wzm
938641..940065	+	474	wzt	lpp0838	COG1134GM	ABC transporter of LPS O-antigen, Wzt
940071..941219	+	382	-	lpp0839	-	hypothetical protein
941233..942123	-	296	-	lpp0840	COG1216R	hypothetical protein
942904..943977	+	357	lag-1	lpp0841	COG1835I	O-acetyltransferase
944090..944983	-	297	-	lpp0842	COG1216R	hypothetical protein
944977..945996	-	339	-	lpp0843	COG1216R	hypothetical protein
946208..946915	+	235	-	lpp0844	COG0491R	hypothetical protein
947474..947668	+	64	csrA	lpp0845	COG1551T	carbon storage regulator
947794..949776	-	660	-	lpp0846	COG1835I	hypothetical protein
949939..950934	-	331	birA	lpp0847	COG0340H	biotin-[acetylCoA carboxylase] holoenzyme synthetase and biotin operon repressor
950938..951675	-	245	-	lpp0848	COG2091H	hypothetical protein
951757..952710	+	317	accA	lpp0849	COG0825I	acetyl-CoA carboxylase carboxyltransferase subunit alpha
952703..953998	+	431	-	lpp0850	COG0037D	hypothetical protein
954348..954884	+	178	-	lpp0851	COG1943L	hypothetical protein

## Sheet: Region 7
Genome position	Strand	#of aminoacids	Gene name	Gene Identifier	COG#	Annotation
1160427..1160738	+	103	-	lpp1034	-	hypothetical protein
1160719..1161894	-	391	-	lpp1035	COG3464L	hypothetical protein
1162018..1162479	+	153	-	lpp1036	COG3751O	hypothetical protein
1162551..1163618	+	355	-	lpp1037	-	hypothetical protein
1164101..1164769	+	222	-	lpp1038	COG2135S	hypothetical protein
1164905..1165411	+	168	-	lpp1039	COG1974KT	hypothetical protein
1165398..1166675	+	425	-	lpp1040	COG0389L	hypothetical protein
1167580..1167714	+	44	-	lpp1041	-	hypothetical protein
1167841..1168683	-	280	-	lpp1042	-	hypothetical protein
1169145..1169642	+	165	-	lpp1043	-	hypothetical protein
1169805..1170311	-	168	-	lpp1044	COG4734R	hypothetical protein
1170377..1170799	-	140	-	lpp1045	COG0629L	hypothetical protein
1170899..1171093	-	64	-	lpp1046	-	hypothetical protein
1171610..1171903	+	97	-	lpp1047	-	hypothetical protein
1171958..1172857	-	299	-	lpp1048	-	hypothetical protein
1172850..1173656	-	268	-	lpp1049	-	hypothetical protein
1174294..1174938	+	214	-	lpp1050	-	hypothetical protein
1174951..1175262	-	103	-	lpp1051	-	hypothetical protein
1175704..1175988	+	94	-	lpp1053	-	hypothetical protein
1176324..1177259	-	311	-	lpp1054	-	hypothetical protein
1177462..1179441	-	659	-	lpp1055	COG3505U	hypothetical protein
1179438..1179767	-	109	-	lpp1056	-	hypothetical protein
1179961..1181514	-	517	-	lpp1057	-	hypothetical protein
1181517..1182884	-	455	-	lpp1058	-	hypothetical protein
1182894..1183868	-	324	-	lpp1059	-	hypothetical protein
1183861..1186611	-	916	-	lpp1060	COG3451U	hypothetical protein
1186621..1186968	-	115	-	lpp1061	-	hypothetical protein
1186925..1188184	-	419	-	lpp1062	-	hypothetical protein
1188181..1188957	-	258	-	lpp1063	-	hypothetical protein
1188944..1189600	-	218	-	lpp1064	-	hypothetical protein
1189593..1189955	-	120	-	lpp1065	-	hypothetical protein
1189967..1190332	-	121	-	lpp1066	-	hypothetical protein
1190329..1190595	-	88	-	lpp1067	-	hypothetical protein
1190595..1190921	-	108	-	lpp1068	-	hypothetical protein
1190931..1191563	-	210	-	lpp1069	-	hypothetical protein
1191554..1191985	-	143	-	lpp1070	-	hypothetical protein
1191985..1192806	-	273	-	lpp1071	-	hypothetical protein
1192799..1193383	-	194	-	lpp1072	-	hypothetical protein
1193380..1193793	-	137	-	lpp1073	-	hypothetical protein
1193786..1194004	-	72	-	lpp1074	COG1551T	hypothetical protein
1193998..1194510	-	170	-	lpp1075	-	hypothetical protein
1194362..1195264	-	300	-	lpp1076	-	hypothetical protein
1195431..1195685	+	84	-	lpp1077	COG1813K	hypothetical protein
1195761..1196723	+	320	-	lpp1078	COG0270L	hypothetical protein
1196727..1197470	-	247	-	lpp1079	-	hypothetical protein
1197572..1198027	-	151	-	lpp1080	COG3727L	hypothetical protein
1198125..1199183	-	352	-	lpp1081	-	hypothetical protein
1199195..1200490	-	431	-	lpp1082	COG2270R	hypothetical protein
1200495..1201013	-	172	-	lpp1083	COG0242J	hypothetical protein
1200994..1201569	-	191	-	lpp1084	-	hypothetical protein
1201598..1202089	-	163	-	lpp1085	-	hypothetical protein
1202296..1202541	+	81	-	lpp1086	-	hypothetical protein
1202564..1202782	+	72	-	lpp1087	COG3311K	hypothetical protein
1203051..1204295	-	414	-	lpp1088	COG0582L	hypothetical protein

## Sheet: Region 8
Genome position	Strand	#of aminoacids	Gene name	Gene Identifier	COG#	Annotation
1444162..1444950	+	262	-	lpp1297	COG3147S	hypothetical protein
1444931..1445464	+	177	-	lpp1298	COG1286R	hypothetical protein
1445439..1446074	-	211	nadD	lpp1299	COG1057H	hypothetical protein
1446062..1447087	-	341	-	lpp1300	COG1466L	hypothetical protein
1447089..1447580	-	163	-	lpp1301	COG2980M	hypothetical protein
1447681..1450152	-	823	leuS	lpp1302	COG0495J	leucyl-tRNA synthetase
1450218..1451753	-	511	-	lpp1303	COG0815M	hypothetical protein
1451907..1452995	+	362	-	lpp1304	COG1748E	hypothetical protein
1453005..1454525	+	506	-	lpp1305	COG1012C	hypothetical protein
1454645..1457014	+	789	-	lpp1306	COG1250I	hypothetical protein
1457030..1458214	+	394	fadA	lpp1307	COG0183I	acetyl-CoA acetyltransferase
1458327..1459502	-	391	-	lpp1308	-	hypothetical protein
1459664..1462561	-	965	sidG	lpp1309	COG1196D	SidG protein, substrate of the Dot/Icm system
1462790..1463920	+	376	-	lpp1310	COG0790R	hypothetical protein
1464059..1466437	-	792	-	lpp1311	COG5001T	hypothetical protein
1466752..1467720	-	322	lspK	lpp1312	COG3156U	type II secretory pathway protein
1467707..1468324	-	205	lspJ	lpp1313	COG4795U	type II secretory pathway protein LspJ
1468321..1468698	-	125	lspI	lpp1314	COG2165NU	type II secretory pathway protein LspI
1468695..1469180	-	161	lspH	lpp1315	COG4970NU	type II secretory pathway protein LspH
1469167..1469589	-	140	lspG	lpp1316	COG2165NU	type II secretory pathway protein LspG
1469693..1470892	-	399	lspF	lpp1317	COG1459NU	type II secretory pathway protein LspF
1470989..1472398	+	469	glnA	lpp1318	COG0174E	glutamine synthetase
1472411..1472971	+	186	-	lpp1319	-	hypothetical protein
1472984..1473748	+	254	-	lpp1320	COG3022S	hypothetical protein
1473778..1474677	+	299	-	lpp1321	COG2515E	hypothetical protein
1474889..1476466	+	525	-	lpp1322	-	hypothetical protein
1476668..1478539	+	623	htpG	lpp1323	COG0326O	heat shock protein 90
1478651..1478947	-	98	-	lpp1324	COG2901KL	hypothetical protein
1479063..1480217	-	384	lpxB	lpp1325	COG0763M	lipid-A-disaccharide synthase
1480204..1481166	-	320	-	lpp1326	COG0673R	hypothetical protein
1481387..1481962	+	191	rnhB	lpp1327	COG0164L	ribonuclease HII
1482074..1483192	-	372	rodA	lpp1328	COG0772D	rod shape-determining protein rodA
1483189..1485042	-	617	mrdA	lpp1329	COG0768M	penicillin-binding protein 2
1485268..1486245	+	325	-	lpp1330	-	hypothetical protein
1486508..1486978	-	156	-	lpp1331	COG1576S	rRNA large subunit methyltransferase
1486987..1487325	-	112	-	lpp1332	COG0799S	hypothetical protein
1487430..1488872	-	480	-	lpp1333	COG3104E	hypothetical protein
1489095..1490759	+	554	hutU	lpp1334	COG2987E	urocanate hydratase
1490773..1492293	+	506	hutH	lpp1335	COG2986E	histidine ammonia-lyase
1492286..1493695	+	469	-	lpp1336	COG1012C	hypothetical protein
1493707..1494516	+	269	-	lpp1337	COG1028IQR	short chain dehydrogenase
1494513..1494944	+	143	rnhA	lpp1338	COG0328L	ribonuclease H
1494949..1495650	+	233	dnaQ	lpp1339	COG0847L	hypothetical protein
1495857..1496234	-	125	-	lpp1340	-	hypothetical protein
1496526..1496999	+	157	-	lpp1341	COG1376S	hypothetical protein
1497118..1498521	+	467	-	lpp1342	COG1196D	hypothetical protein
1498587..1498979	-	130	-	lpp1343	COG0316S	iron-sulfur cluster insertion protein ErpA
1499114..1500199	-	361	mnmA	lpp1344	COG0482J	tRNA-specific 2-thiouridylase MnmA
1500469..1500897	+	142	-	lpp1345	COG1399R	hypothetical protein
1500983..1501174	+	63	rpmF	lpp1346	COG0333J	50S ribosomal protein L32
1501180..1502208	+	342	plsX	lpp1347	COG0416I	glycerol-3-phosphate acyltransferase PlsX
1502205..1503158	+	317	fabH	lpp1348	COG0332I	3-oxoacyl-ACP synthase
1503185..1504132	+	315	fabD	lpp1349	COG0331I	malonyl CoA-ACP transacylase
1504144..1504890	+	248	fabG	lpp1350	COG1028IQR	3-oxoacyl-ACP reductase
1504975..1505223	+	82	acpP	lpp1351	COG0236IQ	acyl carrier protein
1505243..1506481	+	412	fabF	lpp1352	COG0304IQ	3-oxoacyl-ACP synthase
1506482..1507480	+	332	-	lpp1353	COG1559R	hypothetical protein
1507480..1508118	+	212	tmk	lpp1354	COG0125F	thymidylate kinase
1508115..1509020	+	301	-	lpp1355	COG2812L	hypothetical protein
1509131..1509487	+	118	pilZ	lpp1356	COG3215NU	hypothetical protein
1509547..1510335	+	262	lidH	lpp1357	COG0084L	hypothetical protein
1510447..1511547	+	366	anmK	lpp1358	COG2377O	anhydro-N-acetylmuramic acid kinase
1511603..1512895	+	430	-	lpp1359	COG2271G	hypothetical protein
1513413..1514693	-	426	-	lpp1360	COG2814G	hypothetical protein
1514924..1516090	+	388	-	lpp1361	COG0463M	hypothetical protein
1516178..1517563	-	461	-	lpp1362	COG1807M	hypothetical protein
1517653..1518804	+	383	-	lpp1363	COG0510M	hypothetical protein
1518857..1519627	-	256	-	lpp1364	COG3298L	hypothetical protein
1519873..1520469	+	198	-	lpp1365	COG4764S	hypothetical protein
1520874..1521530	+	218	adk	lpp1366	COG0563F	adenylate kinase
1521539..1521901	+	120	-	lpp1367	COG3118O	hypothetical protein
1521861..1523381	-	506	glpD	lpp1368	COG0578C	glycerol-3-phosphate dehydrogenase
1523443..1524918	+	491	glpK	lpp1369	COG0554C	glycerol kinase
1525012..1526283	-	423	gltA	lpp1370	COG0372C	citrate synthase
1526509..1527390	+	293	-	lpp1371	COG2820F	hypothetical protein
1527474..1530065	+	863	gyrA	lpp1372	COG0188L	DNA gyrase, subunit A, type II topoisomerase
1530058..1531146	+	362	serC	lpp1373	COG1932HE	phosphoserine aminotransferase
1531152..1532453	+	433	aroA	lpp1374	COG0128E	3-phosphoshikimate 1-carboxyvinyltransferase
1532453..1533145	+	230	kcy	lpp1375	COG0283F	cytidylate kinase
1533211..1534887	+	558	rpsA	lpp1376	COG0539J	30S ribosomal protein S1
1535001..1535291	+	96	-	lpp1377	COG3771S	hypothetical protein
1535338..1536507	+	389	-	lpp1378	COG2956G	tetratricopeptide repeat protein
1536771..1537886	+	371	-	lpp1379	COG0399M	hypothetical protein
1537887..1538576	+	229	pyrF	lpp1380	COG0284F	orotidine 5'-phosphate decarboxylase
1538766..1541417	+	883	-	lpp1381	COG1752R	hypothetical protein
1541362..1542141	+	259	-	lpp1382	COG0300R	hypothetical protein
1542147..1542629	+	160	-	lpp1383	COG4970NU	hypothetical protein
1542746..1543282	+	178	-	lpp1384	COG3161H	hypothetical protein
1543279..1544127	+	282	ubiA	lpp1385	COG0382H	4-hydroxybenzoate polyprenyltransferase
1544261..1544659	-	132	-	lpp1386	COG3133M	hypothetical protein
1544739..1546511	-	590	-	lpp1387	COG0277C	hypothetical protein
1546565..1547329	-	254	deoC	lpp1388	COG0274F	hypothetical protein
1547326..1548165	-	279	xapA	lpp1389	COG0005F	purine nucleoside phosphorylase
1548178..1548573	-	131	-	lpp1390	COG0295F	hypothetical protein
1548612..1549415	-	267	-	lpp1391	-	hypothetical protein
1549592..1550959	-	455	cpxA	lpp1392	COG0642T	sensor histidine kinase
1550952..1551632	-	226	cpxR	lpp1393	COG0745TK	transcriptional regulatory protein CpxR
1551640..1552518	-	292	-	lpp1394	COG4535P	hypothetical protein
1552490..1552966	-	158	-	lpp1395	COG0319R	hypothetical protein
1552963..1553913	-	316	-	lpp1396	COG1702T	hypothetical protein
1554192..1555031	+	279	-	lpp1397	COG0613R	hypothetical protein
1555028..1555648	+	206	-	lpp1398	COG0009J	hypothetical protein
1555894..1557108	+	404	trpS	lpp1399	COG0180J	tryptophanyl-tRNA synthetase
1557108..1557899	+	263	scpA	lpp1400	COG1354S	hypothetical protein

## Sheet: Region 9
Genome position	Strand	#of aminoacids	Gene name	Gene Identifier	COG#	Annotation
1649217..1649543	-	108	-	lpp1477	COG4517S	hypothetical protein
1649726..1650469	-	247	-	lpp1478	-	hypothetical protein
1650728..1652452	+	574	pilB	lpp1479	COG2804NU	pilus assembly protein PilB
1652458..1653678	+	406	pilC	lpp1480	COG1459NU	pilus assembly protein PilC
1653724..1654587	+	287	pilD	lpp1481	COG1989NOU	Type 4 prepilin-like proteins leader peptide processing enzyme
1654601..1655806	-	401	-	lpp1482	COG0664T	hypothetical protein
1655914..1656507	-	197	-	lpp1483	-	hypothetical protein
1656523..1656978	-	151	-	lpp1484	-	hypothetical protein
1657112..1657927	+	271	-	lpp1485	COG1806S	hypothetical protein
1658047..1659495	-	482	prpD	lpp1486	COG2079R	2-methylcitrate dehydratase
1659497..1660615	-	372	prpC	lpp1487	COG0372C	2-methylcitrate synthase
1660831..1661616	-	261	-	lpp1488	COG0384R	hypothetical protein
1661702..1663702	-	666	-	lpp1489	COG4121S	hypothetical protein
1663695..1665182	-	495	-	lpp1490	COG3104E	hypothetical protein
1665620..1666906	-	428	hemL	lpp1491	COG0001H	glutamate-1-semialdehyde aminotransferase
1667294..1667470	+	58	-	lpp1492	COG1773C	hypothetical protein
1667467..1667889	-	140	-	lpp1493	COG1981S	hypothetical protein
1667892..1668623	-	243	-	lpp1494	COG0861P	hypothetical protein
1668930..1670201	+	423	pcnB	lpp1495	COG0617J	poly(A) polymerase
1670198..1670623	+	141	folK	lpp1496	COG0801H	hypothetical protein
1670678..1671100	+	140	-	lpp1497	COG0589T	hypothetical protein
1671177..1672565	-	462	engA	lpp1498	COG1160R	GTP-binding protein EngA
1672570..1673724	-	384	-	lpp1499	COG1520S	hypothetical protein
1673749..1674423	-	224	-	lpp1500	COG2976S	hypothetical protein
1674441..1675721	-	426	hisS	lpp1501	COG0124J	histidyl-tRNA synthetase

[truncated: 5 more sheets: Region 10, Region 11, Region 12, Region 13, Region 14]
