# Supplementary material for: Multiple major disease-associated clones of Legionella pneumophila have emerged recently and independently
Source: Genome Res. 2016 Nov;26(11):1555–64. doi: 10.1101/gr.209536.116 (PMC5088597; doi:10.1101/gr.209536.116)
Supplement: Supplemental Material [file supp_gr.209536.116_Supplemental_Table_S6.xlsx]

## Sheet: Affected taxa
Table S6. Highlighted recombined regions in the SynTView representation of the ST23 lineage.
Region 1	Region 2	Region 3	Region 4	Region 5	Region 6	Region 7	Region 8	Region 9
ST23_29_LG09454021	ST23_29_LG09454021	ST23_35_LG11402026	ST23_15_HL04371017	ST23_15_HL04371017	ST23_6_EUL00130	ST23_30_LG10255002	ST23_28_LG09403015	ST23_30_LG10255002
ST23_32_LG10481020	ST23_32_LG10481020	ST23_14_HL03393028	ST23_20_HL06043045		ST23_7_EUL00129	ST23_29_LG09454021	ST23_24_LG08345006
ST23_28_LG09403015	ST23_28_LG09403015	ST23_15_HL04371017	ST23_6_EUL00130		ST23_8_EUL00004	ST23_32_LG10481020
ST23_24_LG08345006	ST23_24_LG08345006	ST23_20_HL06043045	ST23_7_EUL00129			ST23_28_LG09403015
ST23_11_HL02365014	ST23_11_HL02365014	ST23_6_EUL00130	ST23_8_EUL00004			ST23_24_LG08345006
ST23_12_HL02365015	ST23_12_HL02365015	ST23_7_EUL00129	ST23_22_HL07093017			ST23_11_HL02365014
ST23_13_HL03021012	ST23_13_HL03021012	ST23_8_EUL00004	ST23_30_LG10255002			ST23_12_HL02365015
ST23_19_HL05415018	ST23_19_HL05415018	ST23_22_HL07093017	ST23_29_LG09454021			ST23_13_HL03021012
ST23_21_HL06373021	ST23_21_HL06373021	ST23_30_LG10255002	ST23_32_LG10481020			ST23_19_HL05415018
ST23_23_LG07512008	ST23_23_LG07512008	ST23_29_LG09454021	ST23_28_LG09403015			ST23_21_HL06373021
ST23_25_LG08392025	ST23_25_LG08392025	ST23_32_LG10481020	ST23_24_LG08345006			ST23_23_LG07512008
ST23_26_LG09153012	ST23_26_LG09153012	ST23_28_LG09403015	ST23_11_HL02365014			ST23_25_LG08392025
ST23_31_LG10363013	ST23_31_LG10363013	ST23_24_LG08345006	ST23_12_HL02365015			ST23_26_LG09153012
ST23_34_LG11363009	ST23_34_LG11363009	ST23_11_HL02365014	ST23_13_HL03021012			ST23_31_LG10363013
ST23_37_LG12465006	ST23_37_LG12465006	ST23_12_HL02365015	ST23_19_HL05415018			ST23_34_LG11363009
ST23_10_HL01273027	ST23_10_HL01273027	ST23_13_HL03021012	ST23_21_HL06373021			ST23_37_LG12465006
ST23_16_HL04433031	ST23_16_HL04433031	ST23_19_HL05415018	ST23_23_LG07512008			ST23_10_HL01273027
ST23_17_HL05063005	ST23_17_HL05063005	ST23_21_HL06373021	ST23_25_LG08392025			ST23_16_HL04433031
ST23_18_HL05322037	ST23_18_HL05322037	ST23_23_LG07512008	ST23_26_LG09153012			ST23_17_HL05063005
ST23_27_LG09353013	ST23_27_LG09353013	ST23_25_LG08392025	ST23_31_LG10363013			ST23_18_HL05322037
ST23_33_LG11272006	ST23_33_LG11272006	ST23_26_LG09153012	ST23_34_LG11363009			ST23_27_LG09353013
ST23_36_LG12242012	ST23_36_LG12242012	ST23_31_LG10363013	ST23_37_LG12465006			ST23_33_LG11272006
ST23_9_EUL00028	ST23_9_EUL00028	ST23_34_LG11363009	ST23_10_HL01273027			ST23_36_LG12242012
		ST23_37_LG12465006	ST23_16_HL04433031			ST23_9_EUL00028
		ST23_10_HL01273027	ST23_17_HL05063005
		ST23_16_HL04433031	ST23_18_HL05322037
		ST23_17_HL05063005	ST23_27_LG09353013
		ST23_18_HL05322037	ST23_33_LG11272006
		ST23_27_LG09353013	ST23_36_LG12242012
		ST23_33_LG11272006	ST23_9_EUL00028
		ST23_36_LG12242012
		ST23_9_EUL00028

## Sheet: Region 1
Genome position	Strand	#of aminoacids	Gene name	Gene Identifier	COG#	Annotation
2139757..2142297	+	846	-	st23_001980	-	DNA mismatch repair protein MutS
2142310..2143998	+	562	-	st23_001981	-	Outer membrane protein assembly factor YaeT precursor
2143995..2146535	+	846	-	st23_001982	-	FIG00759224: hypothetical protein
2146569..2147564	+	331	-	st23_001983	-	Porphobilinogen synthase (EC 4.2.1.24)
2147701..2148093	+	130	-	st23_001984	-	FIG00758268: hypothetical protein
2148391..2149869	-	492	-	st23_001985	-	Long-chain fatty acid transport protein
2150155..2152734	+	859	-	st23_001986	-	Aspartokinase (EC 2.7.2.4) / Diaminopimelate decarboxylase (EC 4.1.1.20)
2152739..2155969	+	1076	-	st23_001987	-	ATP-dependent nuclease subunit A
2156177..2157250	+	357	-	st23_001988	-	Scaffold protein for [4Fe-4S] cluster assembly ApbC, MRP-like
2157284..2157424	-	46	-	st23_001989	-	hypothetical protein
2157366..2157920	+	184	-	st23_001990	-	FIG00758849: hypothetical protein
2157968..2158858	-	296	-	st23_001991	-	Hydrogen peroxide-inducible genes activator
2159073..2160290	+	405	-	st23_001992	-	FIG00758938: hypothetical protein
2160292..2161299	-	335	-	st23_001993	-	FIG00758658: hypothetical protein
2161244..2162215	-	323	-	st23_001994	-	Tetraacyldisaccharide 4'-kinase (EC 2.7.1.130)
2162215..2164008	-	597	-	st23_001995	-	Lipid A export ATP-binding/permease protein MsbA (EC 3.6.3.25)
2164068..2164865	-	265	-	st23_001996	-	FIG00758393: hypothetical protein
2164871..2166037	-	388	-	st23_001997	-	Dihydroorotate dehydrogenase (EC 1.3.3.1)
2166158..2167156	-	332	-	st23_001998	-	FIG00759994: hypothetical protein
2167204..2167890	-	228	-	st23_001999	-	hypothetical protein
2168216..2169385	+	389	-	st23_002000	-	Isovaleryl-CoA dehydrogenase (EC 1.3.8.4)
2169397..2170581	+	394	-	st23_002001	-	3-ketoacyl-CoA thiolase (EC 2.3.1.16) @ Acetyl-CoA acetyltransferase (EC 2.3.1.9)
2170714..2171034	+	106	-	st23_002002	-	FIG00759991: hypothetical protein
2171044..2172651	+	535	-	st23_002003	-	Methylcrotonyl-CoA carboxylase carboxyl transferase subunit (EC 6.4.1.4)
2172608..2173465	+	285	-	st23_002004	-	Methylglutaconyl-CoA hydratase (EC 4.2.1.18)
2173368..2175422	+	684	-	st23_002005	-	Methylcrotonyl-CoA carboxylase biotin-containing subunit (EC 6.4.1.4)
2175433..2176341	+	302	-	st23_002006	-	Hydroxymethylglutaryl-CoA lyase (EC 4.1.3.4)
2176441..2178438	+	665	-	st23_002007	-	Acetoacetyl-CoA synthetase (EC 6.2.1.16)
2178598..2179014	-	138	-	st23_002008	-	FIG00760413: hypothetical protein
2179392..2180492	+	366	-	st23_002009	-	Methionine ABC transporter ATP-binding protein

## Sheet:  Region 2
Genome position	Strand	#of aminoacids	Gene name	Gene Identifier	COG#	Annotation
2701915..2702571	+	218	-	st23_002488	-	DedA protein
2702635..2704869	-	744	-	st23_002489	-	FIG00758042: hypothetical protein
2704960..2705658	-	232	-	st23_002490	-	Glutamine amidotransferase, class I (EC 6.3.5.2)
2705788..2706948	-	386	-	st23_002491	-	Alcohol dehydrogenase (EC 1.1.1.1)
2707078..2708475	-	465	-	st23_002492	-	Aldehyde dehydrogenase (EC 1.2.1.3)
2708513..2709886	-	457	-	st23_002493	-	glutamine synthetase family protein
2709938..2710726	-	262	-	st23_002494	-	Glutamate synthase [NADPH] large chain (EC 1.4.1.13)
2710723..2711586	-	287	-	st23_002495	-	Uncharacterized protein conserved in bacteria, NMA0228-like
2711662..2711958	-	98	-	st23_002496	-	FIG00760162: hypothetical protein
2712344..2713762	-	472	-	st23_002497	-	Metallo-beta-lactamase family protein, RNA-specific
2713825..2714475	-	216	-	st23_002498	-	FIG00757962: hypothetical protein
2714592..2714882	+	96	-	st23_002499	-	FIG00758142: hypothetical protein
2714973..2715296	-	107	-	st23_002500	-	Periplasmic, osmotically inducible protein Y-like

## Sheet: Region 3
Genome position	Strand	#of aminoacids	Gene name	Gene Identifier	COG#	Annotation
2821290..2822417	-	375	-	st23_002602	-	FIG00759327: hypothetical protein
2822267..2822644	-	125	-	st23_002603	-	hypothetical protein
2822802..2822987	+	61	-	st23_002604	-	hypothetical protein
2822980..2823756	+	258	-	st23_002605	-	methylase
2823742..2824305	-	187	-	st23_002606	-	acetyltransferase, GNAT family
2824309..2825634	-	441	-	st23_002607	-	FIG00760698: hypothetical protein
2825744..2827225	+	493	-	st23_002608	-	FIG00761547: hypothetical protein
2834137..2834826	-	229	-	st23_002616	-	FIG00761034: hypothetical protein
2835021..2835905	+	294	-	st23_002617	-	hypothetical protein
2835769..2836236	+	155	-	st23_002618	-	Legionella vir region protein
2836253..2836513	+	86	-	st23_002619	-	Carbon storage regulator
2836542..2837507	+	321	-	st23_002620	-	Conjugative transfer protein TrbB
2837519..2837896	+	125	-	st23_002621	-	Conjugative transfer protein TrbC
2837893..2838192	+	99	-	st23_002622	-	Conjugative transfer protein TrbD
2838189..2840723	+	844	-	st23_002623	-	Conjugative transfer protein TrbE
2840660..2841418	+	252	-	st23_002624	-	Conjugative transfer protein TrbF
2841415..2842290	+	291	-	st23_002625	-	Conjugative transfer protein TrbG
2842284..2842700	+	138	-	st23_002626	-	Conjugative transfer protein TrbH
2842706..2843950	+	414	-	st23_002627	-	Conjugative transfer protein TrbI
2843947..2844702	+	251	-	st23_002628	-	Conjugative transfer protein TrbJ
2844725..2844937	+	70	-	st23_002629	-	hypothetical protein
2844879..2846324	+	481	-	st23_002630	-	Conjugative transfer protein TrbL
2846321..2848210	+	629	-	st23_002631	-	IncP-type DNA transfer coupling protein TraG
2848207..2848752	+	181	-	st23_002632	-	IncP-type DNA transfer maturation peptidase TraF
2848749..2848913	+	54	-	st23_002633	-	Protein traD
2848864..2851092	+	742	-	st23_002634	-	DNA primase (EC 2.7.7.-)
2851149..2851889	-	246	-	st23_002635	-	FIG00759818: hypothetical protein
2851996..2853867	-	623	-	st23_002636	-	IncP-type DNA relaxase TraI
2853864..2854217	-	117	-	st23_002637	-	IncP-type oriT binding protein TraJ
2854632..2854976	+	114	-	st23_002638	-	TraK
2854976..2855701	+	241	-	st23_002639	-	IncP-type DNA transfer protein TraL
2855701..2856141	+	146	-	st23_002640	-	IncP-type DNA transfer protein TraM
2856306..2857763	+	485	-	st23_002641	-	ATP-dependent DNA helicase
2858359..2858592	+	77	-	st23_002642	-	hypothetical protein
2858673..2859524	-	283	-	st23_002643	-	FIG00760547: hypothetical protein
2859521..2860258	-	245	-	st23_002644	-	hypothetical protein
2860372..2860635	+	87	-	st23_002645	-	hypothetical protein
2860584..2861396	+	270	-	st23_002646	-	hypothetical protein
2861489..2861680	-	63	-	st23_002647	-	hypothetical protein
2861774..2862952	+	392	-	st23_002648	-	FIG00758091: hypothetical protein
2862982..2864100	+	372	-	st23_002649	-	hypothetical protein
2863677..2863964	-	95	-	st23_002650	-	hypothetical protein
2864404..2864562	+	52	-	st23_002651	-	hypothetical protein
2864610..2864951	+	113	-	st23_002652	-	Mobile element protein
2864986..2865459	+	157	-	st23_002653	-	transposase
2865708..2865959	-	83	-	st23_002654	-	hypothetical protein
2866040..2866234	-	64	-	st23_002655	-	UPF0337 protein yjbJ
2866367..2866720	-	117	-	st23_002656	-	antigen
2866778..2866960	+	60	-	st23_002657	-	hypothetical protein
2867577..2868080	+	167	-	st23_002658	-	acetyltransferase, GNAT family
2868083..2869264	-	393	-	st23_002659	-	Acetylornithine deacetylase (EC 3.5.1.16)
2869460..2869600	-	46	-	st23_002660	-	hypothetical protein
2869849..2871066	+	405	-	st23_002661	-	Fatty acid desaturase (EC 1.14.19.1); Delta-9 fatty acid desaturase (EC 1.14.19.1)
2871089..2871241	+	50	-	st23_002662	-	hypothetical protein
2871273..2873048	-	591	-	st23_002663	-	transporter, putative
2873203..2873352	+	49	-	st23_002664	-	hypothetical protein
2873754..2874584	+	276	-	st23_002665	-	hypothetical protein
2874475..2874741	+	88	-	st23_002666	-	Uncharacterized protein MJ0678
2875009..2876019	+	336	-	st23_002667	-	Fatty acid desaturase
2876314..2876649	+	111	-	st23_002668	-	hypothetical protein
2876819..2878150	+	443	-	st23_002669	-	Na+/H+ antiporter NhaA type

## Sheet: Region 4
Genome position	Strand	#of aminoacids	Gene name	Gene Identifier	COG#	Annotation
3510590..3511867	-	425	-	st23_003265	-	Error-prone, lesion bypass DNA polymerase V (UmuC)
3511854..3512360	-	168	-	st23_003266	-	Error-prone repair protein UmuD
3512496..3513242	-	248	-	st23_003267	-	Gll2498 protein
3513272..3513469	+	65	-	st23_003268	-	hypothetical protein
3513353..3513511	-	52	-	st23_003269	-	hypothetical protein
3513889..3514950	+	353	-	st23_003270	-	Chromosome (plasmid) partitioning protein ParA / Sporulation initiation inhibitor protein Soj
3514964..3516361	+	465	-	st23_003271	-	hypothetical protein
3516650..3518104	+	484	-	st23_003272	-	hypothetical protein
3518106..3519128	-	340	-	st23_003273	-	FIG00761187: hypothetical protein
3519527..3520789	+	420	-	st23_003274	-	FIG00759617: hypothetical protein
3520746..3521924	+	392	-	st23_003275	-	FIG00761579: hypothetical protein
3522072..3522323	+	83	-	st23_003276	-	FIG00760052: hypothetical protein
3522328..3523350	+	340	-	st23_003277	-	Sulfur carrier protein adenylyltransferase ThiF
3523347..3524408	+	353	-	st23_003278	-	FIG00760458: hypothetical protein
3524401..3525435	+	344	-	st23_003279	-	Conserved protein
3525506..3525733	+	75	-	st23_003280	-	FIG00758975: hypothetical protein
3525790..3525948	+	52	-	st23_003281	-	Carbon storage regulator
3526082..3526828	+	248	-	st23_003282	-	IncF plasmid conjugative transfer surface exclusion protein TraT
3526948..3527235	+	95	-	st23_003283	-	hypothetical protein
3527248..3527544	+	98	-	st23_003284	-	hypothetical protein
3527554..3528123	+	189	-	st23_003285	-	IncF plasmid conjugative transfer pilus assembly protein TraE
3528116..3528832	+	238	-	st23_003286	-	IncF plasmid conjugative transfer pilus assembly protein TraK
3528732..3530198	+	488	-	st23_003287	-	IncF plasmid conjugative transfer pilus assembly protein TraB
3530195..3530485	+	96	-	st23_003288	-	hypothetical protein
3530446..3533073	+	875	-	st23_003289	-	IncF plasmid conjugative transfer pilus assembly protein TraC
3533064..3533399	+	111	-	st23_003290	-	Exonuclease SbcD
3533396..3534031	+	211	-	st23_003291	-	IncF plasmid conjugative transfer pilus assembly protein TraW
3533985..3535004	+	339	-	st23_003292	-	IncF plasmid conjugative transfer pilus assembly protein TraU
3534961..3535440	+	159	-	st23_003293	-	IncF plasmid conjugative transfer protein TrbC
3535433..3537124	+	563	-	st23_003294	-	IncF plasmid conjugative transfer protein TraN
3537111..3537857	+	248	-	st23_003295	-	IncF plasmid conjugative transfer pilus assembly protein TraF
3537857..3538363	+	168	-	st23_003296	-	IncF plasmid conjugative transfer protein TrbB
3538363..3539727	+	454	-	st23_003297	-	IncF plasmid conjugative transfer pilus assembly protein TraH
3539739..3542546	+	935	-	st23_003298	-	IncF plasmid conjugative transfer protein TraG
3542512..3543135	+	207	-	st23_003299	-	FIG00757987: hypothetical protein
3543227..3545062	+	611	-	st23_003300	-	IncF plasmid conjugative transfer protein TraD

## Sheet: Region 5
Genome position	Strand	#of aminoacids	Gene name	Gene Identifier	COG#	Annotation
125862..127754	-	630	-	st23_00126	-	Biosynthetic arginine decarboxylase (EC 4.1.1.19)
127774..128631	-	285	-	st23_00127	-	N-carbamoylputrescine amidase (3.5.1.53) / Aliphatic amidase AmiE (EC 3.5.1.4)
134674..135513	+	279	-	st23_00135	-	Pirin
135950..137161	+	403	-	st23_00136	-	Ferredoxin reductase
137263..138336	+	357	-	st23_00137	-	Multidrug resistance efflux pump PmrA
138305..139243	+	312	-	st23_00138	-	FIG00758276: hypothetical protein
139228..140133	+	301	-	st23_00139	-	FIG00757965: hypothetical protein
140117..141502	+	461	-	st23_00140	-	Type I secretion system, outer membrane component LapE
141730..143412	+	560	-	st23_00141	-	Vibriolysin, extracellular zinc protease (EC 3.4.24.25) @ Pseudolysin, extracellular zinc protease (EC 3.4.24.26)
55715..156629	-	304	-	st23_00153	-	FIG00760222: hypothetical protein
156664..157857	-	397	-	st23_00154	-	FIG00760099: hypothetical protein
157920..158945	-	341	-	st23_00155	-	FIG00758434: hypothetical protein
159209..159970	+	253	-	st23_00156	-	Tll2454 protein
160161..160583	+	140	-	st23_00157	-	FIG00758431: hypothetical protein
160646..161368	-	240	-	st23_00158	-	FIG00758484: hypothetical protein
161469..161612	-	47	-	st23_00159	-	hypothetical protein
162756..162950	-	64	-	st23_00160	-	Excinuclease ABC, C subunit-like
163629..164372	-	247	-	st23_00161	-	FIG00758105: hypothetical protein
164534..166057	-	507	-	st23_00162	-	FIG00760887: hypothetical protein
166226..166495	+	89	-	st23_00163	-	hypothetical protein
166314..166796	+	160	-	st23_00164	-	FIG00759115: hypothetical protein
166818..167813	-	331	-	st23_00165	-	Integral membrane protein
167997..168272	+	91	-	st23_00166	-	FIG00760167: hypothetical protein
168587..169447	-	286	-	st23_00167	-	FIG00758960: hypothetical protein
169624..169860	-	78	-	st23_00168	-	FIG00758120: hypothetical protein
170063..170275	-	70	-	st23_00169	-	FIG00760655: hypothetical protein
170485..170883	+	132	-	st23_00170	-	FIG00757943: hypothetical protein
170918..171052	+	44	-	st23_00171	-	hypothetical protein
171049..171744	+	231	-	st23_00172	-	Chloramphenicol acetyltransferase (EC 2.3.1.28)
171741..172619	+	292	-	st23_00173	-	N-acetylglutamate synthase (EC 2.3.1.1)
172654..173967	+	437	-	st23_00174	-	Amino acid transporter, permease
174031..174897	+	288	-	st23_00175	-	FIG00758088: hypothetical protein
174958..175137	-	59	-	st23_00176	-	hypothetical protein
175384..175866	-	160	-	st23_00177	-	Glutamate synthase [NADPH] large chain (EC 1.4.1.13)
176079..176972	-	297	-	st23_00178	-	Methylisocitrate lyase (EC 4.1.3.30)
177086..177280	-	64	-	st23_00179	-	FIG00759312: hypothetical protein
177281..178015	-	244	-	st23_00180	-	FIG00758956: hypothetical protein
178008..178736	-	242	-	st23_00181	-	FIG00759004: hypothetical protein
178815..179723	+	302	-	st23_00182	-	Transcriptional regulator, LysR family
179856..180587	+	243	-	st23_00183	-	FIG00758678: hypothetical protein
180730..181740	+	336	-	st23_00184	-	FIG00759008: hypothetical protein
182227..182379	-	50	-	st23_00185	-	hypothetical protein
182356..183672	+	438	-	st23_00186	-	SdbB protein
183780..183941	+	53	-	st23_00187	-	hypothetical protein
183978..184382	-	134	-	st23_00188	-	Mercuric resistance operon regulatory protein
184452..185195	+	247	-	st23_00189	-	FIG00758563: hypothetical protein
185394..186485	+	363	-	st23_00190	-	FIG00758637: hypothetical protein
195116..196585	+	489	-	st23_00200	-	Phosphoribosylglycinamide synthetase, ATP-grasp (A) domain protein
196606..197196	+	196	-	st23_00201	-	FIG00760061: hypothetical protein
197180..198127	+	315	-	st23_00202	-	Permease of the drug/metabolite transporter (DMT) superfamily
198201..199541	+	446	-	st23_00203	-	FIG00760741: hypothetical protein
199936..201147	+	403	-	st23_00204	-	Integrase
201211..201930	+	239	-	st23_00205	-	conserved hypothetical protein
201912..202412	+	166	-	st23_00206	-	RlfB
202517..202681	+	54	-	st23_00207	-	hypothetical protein
202715..203176	+	153	-	st23_00208	-	FIG00759298: hypothetical protein
203109..203558	+	149	-	st23_00209	-	hypothetical protein
204253..205677	-	474	-	st23_00210	-	FIG00761562: hypothetical protein
205696..206304	-	202	-	st23_00211	-	hypothetical protein
206282..206428	-	48	-	st23_00212	-	hypothetical protein
206549..207727	-	392	-	st23_00213	-	Aspartate aminotransferase (EC 2.6.1.1)
207774..209765	+	663	-	st23_00214	-	Excinuclease ABC subunit B
210120..211733	+	537	-	st23_00215	-	GGDEF domain protein
211825..213396	-	523	-	st23_00216	-	Ferredoxin-dependent glutamate synthase (EC 1.4.7.1)
213474..213788	-	104	-	st23_00217	-	Z-ring-associated protein ZapA
213944..214525	+	193	-	st23_00218	-	FIG001590: Putative conserved exported protein precursor
214612..215940	+	442	-	st23_00219	-	Xaa-Pro aminopeptidase (EC 3.4.11.9)
215930..217132	+	400	-	st23_00220	-	2-octaprenyl-6-methoxyphenol hydroxylase (EC 1.14.13.-)
217129..218292	+	387	-	st23_00221	-	2-octaprenyl-3-methyl-6-methoxy-1,4-benzoquinol hydroxylase (EC 1.14.13.-)
218462..219235	+	257	-	st23_00222	-	FIG00761007: hypothetical protein
219225..220577	-	450	-	st23_00223	-	FIG00759029: hypothetical protein
220761..221294	+	177	-	st23_00224	-	FIG00758186: hypothetical protein
221291..222238	-	315	-	st23_00225	-	FIG002781: Alpha-L-glutamate ligase family protein
222235..223758	-	507	-	st23_00226	-	FIG139976: hypothetical protein
223748..224275	-	175	-	st23_00227	-	FIG008443: hypothetical protein
224525..226450	+	641	-	st23_00228	-	FIG00758570: hypothetical protein
226416..227006	-	196	-	st23_00229	-	FIG00757842: hypothetical protein
227233..228006	-	257	-	st23_00230	-	FIG00759264: hypothetical protein
228052..228498	-	148	-	st23_00231	-	FIG00758908: hypothetical protein
228609..232583	+	1324	-	st23_00232	-	FIG00758747: hypothetical protein
232804..233268	+	154	-	st23_00233	-	Glutamate synthase [NADPH] large chain (EC 1.4.1.13)
233664..235844	+	726	-	st23_00234	-	3'-to-5' exoribonuclease RNase R
235810..236586	+	258	-	st23_00235	-	23S rRNA (guanosine-2'-O-) -methyltransferase rlmB (EC 2.1.1.-)
236579..237229	+	216	-	st23_00236	-	Ribose 5-phosphate isomerase A (EC 5.3.1.6)
237293..238672	+	459	-	st23_00237	-	Cytosolic IMP-GMP specific 5'-nucleotidase
238682..239962	-	426	-	st23_00238	-	FIG00757905: hypothetical protein
240152..241345	+	397	-	st23_00239	-	FIG00759591: hypothetical protein
241507..241848	+	113	-	st23_00240	-	Alkylphosphonate utilization operon protein PhnA
241960..242415	+	151	-	st23_00241	-	Two component sensor and regulator, histidine kinase response regulator
242445..245135	-	896	-	st23_00242	-	DNA polymerase I (EC 2.7.7.7)
245138..246208	-	356	-	st23_00243	-	UDP-3-O-[3-hydroxymyristoyl] glucosamine N-acyltransferase (EC 2.3.1.-)
246457..247239	+	260	-	st23_00244	-	FIG00758642: hypothetical protein
247236..248465	-	409	-	st23_00245	-	3-oxoacyl-[acyl-carrier-protein] synthase, KASII (EC 2.3.1.41)
248590..249450	-	286	-	st23_00246	-	N-terminal acetyltransferase, GNAT family
249569..250144	-	191	-	st23_00247	-	Peptide methionine sulfoxide reductase MsrA (EC 1.8.4.11)
250252..250848	-	198	-	st23_00248	-	Putative phosphatidylglycerophosphate synthase
251171..252451	-	426	-	st23_00249	-	Xanthine/uracil permease
252469..253275	-	268	-	st23_00250	-	FIG00759401: hypothetical protein

## Sheet: Region 6
Genome position	Strand	#of aminoacids	Gene name	Gene Identifier	COG#	Annotation
593225..593902	+	225	-	st23_00524	-	Carboxylesterase/phospholipase
593899..594333	+	144	-	st23_00525	-	Putative oligoketide cyclase/lipid transport protein, similarity with yeast ubiquinone-binding protein YOL008W
594287..594592	+	101	-	st23_00526	-	UPF0125 protein yfjF
594680..595024	-	114	-	st23_00527	-	Outer membrane lipoprotein OmlA
595222..595632	+	136	-	st23_00528	-	Ferric uptake regulation protein FUR
595770..595913	+	47	-	st23_00529	-	hypothetical protein
596046..597125	+	359	-	st23_00530	-	Two component response regulator with GGDEF domain
597436..597822	-	128	-	st23_00531	-	FIG00758692: hypothetical protein
598064..598678	+	204	-	st23_00532	-	FIG00759146: hypothetical protein
598718..603007	-	1429	-	st23_00533	-	SdhA, substrate of the Dot/Icm system
603170..603913	-	247	-	st23_00534	-	FIG00759512: hypothetical protein
603894..605150	-	418	-	st23_00535	-	FIG00759148: hypothetical protein
605107..606561	-	484	-	st23_00536	-	ribosomal protein S6 glutaminyl transferase related protein
606565..607284	-	239	-	st23_00537	-	FIG00758134: hypothetical protein
607473..607946	-	157	-	st23_00538	-	FIG00758181: hypothetical protein
607943..608494	-	183	-	st23_00539	-	Osmotically inducible protein Y
608753..609244	-	163	-	st23_00540	-	FIG00758777: hypothetical protein
609306..612161	+	951	-	st23_00541	-	Excinuclease ABC subunit A
612344..612925	+	193	-	st23_00542	-	LemA protein
612936..613955	+	339	-	st23_00543	-	Heat shock protein HtpX (EC 3.4.24.-)
613982..614755	-	257	-	st23_00544	-	ABC transporter, permease protein
614745..615659	-	304	-	st23_00545	-	ABC transporter, ATP binding component
615890..616948	-	352	-	st23_00546	-	FIG00760524: hypothetical protein
617035..617718	-	227	-	st23_00547	-	SM-20-related protein
617759..618466	-	235	-	st23_00548	-	Putative predicted metal-dependent hydrolase
618653..618946	-	97	-	st23_00549	-	FIG00758271: hypothetical protein
619083..619946	+	287	-	st23_00550	-	FIG00758866: hypothetical protein
620047..620514	-	155	-	st23_00551	-	Methylated-DNA--protein-cysteine methyltransferase (EC 2.1.1.63)
620518..620883	-	121	-	st23_00552	-	LSU ribosomal protein L19p
620910..621680	-	256	-	st23_00553	-	tRNA (Guanine37-N1) -methyltransferase (EC 2.1.1.31)
621662..622171	-	169	-	st23_00554	-	16S rRNA processing protein RimM
622046..622180	+	44	-	st23_00555	-	hypothetical protein
622177..622437	-	86	-	st23_00556	-	SSU ribosomal protein S16p
622524..623900	-	458	-	st23_00557	-	Signal recognition particle, subunit Ffh SRP54 (TC 3.A.5.1.1)
624157..624831	-	224	-	st23_00558	-	FIG00758038: hypothetical protein
625093..626016	+	307	-	st23_00559	-	FIG00758098: hypothetical protein
625992..626600	+	202	-	st23_00560	-	FIG00758098: hypothetical protein
626937..628340	+	467	-	st23_00561	-	FIG00759321: hypothetical protein
628396..628920	+	174	-	st23_00562	-	FIG00758254: hypothetical protein
629124..629465	+	113	-	st23_00563	-	Possible carboxymuconolactone decarboxylase family protein (EC 4.1.1.44)
629679..630122	-	147	-	st23_00564	-	FIG00757985: hypothetical protein
630141..630689	-	182	-	st23_00565	-	Putative inner membrane protein
631288..631437	-	49	-	st23_00566	-	hypothetical protein
631352..632080	+	242	-	st23_00567	-	Cytochrome oxidase biogenesis protein Surf1, facilitates heme A insertion
632064..632609	+	181	-	st23_00568	-	FIG00757869: hypothetical protein
632611..633621	+	336	-	st23_00569	-	Heme A synthase, cytochrome oxidase biogenesis protein Cox15-CtaA
633611..634495	+	294	-	st23_00570	-	Heme O synthase, protoheme IX farnesyltransferase (EC 2.5.1.-) COX10-CtaB
634505..635146	+	213	-	st23_00571	-	Cytochrome oxidase biogenesis protein Sco1/SenC/PrrC, putative copper metallochaperone
635512..636420	+	302	-	st23_00572	-	Ribosomal protein S6 glutaminyl transferase
636424..636669	-	81	-	st23_00573	-	FIG00759016: hypothetical protein
636985..638475	+	496	-	st23_00574	-	Glucose-6-phosphate 1-dehydrogenase (EC 1.1.1.49)
638315..639175	+	286	-	st23_00575	-	6-phosphogluconolactonase (EC 3.1.1.31), eukaryotic type
639163..641001	+	612	-	st23_00576	-	Phosphogluconate dehydratase (EC 4.2.1.12)
640940..641983	+	347	-	st23_00577	-	Glucokinase (EC 2.7.1.2)
641970..642632	+	220	-	st23_00578	-	4-hydroxy-2-oxoglutarate aldolase (EC 4.1.3.16) @ 2-dehydro-3-deoxyphosphogluconate aldolase (EC 4.1.2.14)
642746..644167	+	473	-	st23_00579	-	Sugar symporter
644257..645606	-	449	-	st23_00580	-	Glucoamylase precursor (EC 3.2.1.3)
645732..645989	-	85	-	st23_00581	-	Transcriptional regulator, Cro/CI family
646055..646594	-	179	-	st23_00582	-	hypothetical protein
646722..647720	-	332	-	st23_00583	-	Ferrochelatase, protoheme ferro-lyase (EC 4.99.1.1)
647828..648061	-	77	-	st23_00584	-	Cold shock protein CspD
648298..648729	+	143	-	st23_00585	-	Diadenosine tetraphosphate (Ap4A) hydrolase and other HIT family hydrolases
648943..649371	-	142	-	st23_00586	-	FIG00759361: hypothetical protein
649389..650741	+	450	-	st23_00587	-	Type I secretion system, outer membrane component LapE
650881..651918	+	345	-	st23_00588	-	FIG00758050: hypothetical protein
651878..652828	+	316	-	st23_00589	-	FIG00758381: hypothetical protein
652795..653694	+	299	-	st23_00590	-	FIG00758000: hypothetical protein
653716..654096	+	126	-	st23_00591	-	Redox-sensing transcriptional regulator QorR
654098..654529	-	143	-	st23_00592	-	FIG00758887: hypothetical protein
654791..655402	+	203	-	st23_00593	-	Biotin synthesis protein BioC
655557..656168	-	203	-	st23_00594	-	FIG00758986: hypothetical protein
656188..656367	-	59	-	st23_00595	-	FIG00758986: hypothetical protein
656560..658629	+	689	-	st23_00596	-	FIG00758655: hypothetical protein
658835..658972	-	45	-	st23_00597	-	hypothetical protein
659458..660405	-	315	-	st23_00598	-	FIG00758197: hypothetical protein
660272..660412	+	46	-	st23_00599	-	hypothetical protein
660597..660809	+	70	-	st23_00600	-	FIG00758653: hypothetical protein
661153..661287	-	44	-	st23_00601	-	hypothetical protein
661241..661585	+	114	-	st23_00602	-	IcmS protein
661664..662047	+	127	-	st23_00603	-	IcmR protein
662114..662713	+	199	-	st23_00604	-	IcmQ protein
662888..664030	+	380	-	st23_00605	-	IcmP (DotM) protein
664027..666378	+	783	-	st23_00606	-	IcmO (DotL) protein
666782..667351	+	189	-	st23_00607	-	LphA protein
667363..667647	+	94	-	st23_00608	-	IcmM protein
667663..668301	+	212	-	st23_00609	-	IcmL (DotI) protein
668301..669386	+	361	-	st23_00610	-	IcmK (DotH) protein
669391..672537	+	1048	-	st23_00611	-	IcmE (DotG) protein
672552..673361	+	269	-	st23_00612	-	IcmG protein
673369..673953	+	194	-	st23_00613	-	IcmC (DotE) protein
673979..674377	+	132	-	st23_00614	-	IcmD (DotP) protein
674563..675201	+	212	-	st23_00615	-	IcmJ (DotN) protein
675237..678266	+	1009	-	st23_00616	-	IcmB (DotO) protein
678364..679620	-	418	-	st23_00617	-	TphA protein
679623..682544	-	973	-	st23_00618	-	IcmF protein
682544..683329	-	261	-	st23_00619	-	Flagellar motor rotation protein MotB
683614..685203	-	529	-	st23_00620	-	IMP cyclohydrolase (EC 3.5.4.10) / Phosphoribosylaminoimidazolecarboxamide formyltransferase (EC 2.1.2.3)

## Sheet: Region 7
Genome position	Strand	#of aminoacids	Gene name	Gene Identifier	COG#	Annotation
828924..830111	+	395	-	st23_00778	-	Kef-type K+ transport systems, membrane components
830113..831234	+	373	-	st23_00779	-	FIG074102: hypothetical protein
838369..840312	-	647	-	st23_00787	-	PROBABLE TRANSMEMBRANE PROTEIN
840423..840821	-	132	-	st23_00788	-	FIG00758066: hypothetical protein
840742..840915	-	57	-	st23_00789	-	hypothetical protein
840952..841329	+	125	-	st23_00790	-	FIG00759120: hypothetical protein
841482..842837	+	451	-	st23_00791	-	TsaC protein (YrdC domain) required for threonylcarbamoyladenosine t(6)A37 modification in tRNA
842863..845070	-	735	-	st23_00792	-	DNA internalization-related competence protein ComEC/Rec2
852185..853090	-	301	-	st23_00799	-	Polysaccharide deacetylase
853221..854570	-	449	-	st23_00800	-	FIG00759249: hypothetical protein
854860..856341	+	493	-	st23_00801	-	Polymyxin resistance protein ArnT, undecaprenyl phosphate-alpha-L-Ara4N transferase; Melittin resistance protein PqaB

## Sheet: Region 8
Genome position	Strand	#of aminoacids	Gene name	Gene Identifier	COG#	Annotation
1232314..1233219	-	301	-	st23_001140	-	FIG00758022: hypothetical protein
1233408..1235456	+	682	-	st23_001141	-	DNA ligase (EC 6.5.1.2)
1235557..1237740	+	727	-	st23_001142	-	Dipeptide-binding ABC transporter, periplasmic substrate-binding component (TC 3.A.1.5.2)
1237632..1238714	+	360	-	st23_001143	-	Oligopeptide transport system permease protein OppB (TC 3.A.1.5.1)
1238729..1240084	+	451	-	st23_001144	-	Oligopeptide transport system permease protein
1240159..1243605	+	1148	-	st23_001145	-	DNA polymerase III alpha subunit (EC 2.7.7.7)
1243691..1244932	-	413	-	st23_001146	-	FIG00758156: hypothetical protein
1245262..1246146	+	294	-	st23_001147	-	Conserved membrane protein, possible 4-hydroxybenzoate octaprenyltranferase
1246107..1247654	+	515	-	st23_001148	-	FIG00760340: hypothetical protein
1247709..1249586	+	625	-	st23_001149	-	Polysaccharide biosynthesis protein
1249732..1250316	-	194	-	st23_001150	-	FIG00758582: hypothetical protein
1250601..1252295	-	564	-	st23_001151	-	FIG00759507: hypothetical protein
1252403..1252573	+	56	-	st23_001152	-	hypothetical protein
1252763..1253503	+	246	-	st23_001153	-	FIG00758020: hypothetical protein
1253605..1255068	-	487	-	st23_001154	-	Histidine transport protein (permease)
1255449..1256594	+	381	-	st23_001155	-	FIG00758064: hypothetical protein
1257339..1258097	+	252	-	st23_001156	-	FIG00759389: hypothetical protein
1258169..1259248	+	359	-	st23_001157	-	FIG00759455: hypothetical protein
1259268..1260101	-	277	-	st23_001158	-	FIG00759316: hypothetical protein
1259704..1259835	+	43	-	st23_001159	-	hypothetical protein
1260243..1260749	-	168	-	st23_001160	-	Antirestriction protein
1260815..1261237	-	140	-	st23_001161	-	Single-stranded DNA-binding protein
1261338..1261586	-	82	-	st23_001162	-	FIG00759938: hypothetical protein
1261946..1262191	+	81	-	st23_001163	-	hypothetical protein
1262265..1263164	-	299	-	st23_001164	-	Integrase
1263157..1263963	-	268	-	st23_001165	-	FIG00758348: hypothetical protein
1264252..1264455	+	67	-	st23_001166	-	hypothetical protein
1264517..1265941	+	474	-	st23_001167	-	Deoxyguanosinetriphosphate triphosphohydrolase (EC 3.1.5.1)
1265997..1266377	-	126	-	st23_001168	-	hypothetical protein
1266367..1268352	-	661	-	st23_001169	-	FIG00758121: hypothetical protein
1268349..1268678	-	109	-	st23_001170	-	FIG00758787: hypothetical protein
1268693..1268866	+	57	-	st23_001171	-	FIG00758858: hypothetical protein
1268872..1270425	-	517	-	st23_001172	-	putative membrane protein
1270428..1271795	-	455	-	st23_001173	-	FIG00757983: hypothetical protein
1271805..1272860	-	351	-	st23_001174	-	FIG00758673: hypothetical protein
1272772..1275525	-	917	-	st23_001175	-	Type IV secretory pathway, VirB4 components
1275532..1275879	-	115	-	st23_001176	-	hypothetical protein
1275836..1277098	-	420	-	st23_001177	-	putative exported protein
1277095..1277985	-	296	-	st23_001178	-	FIG00758606: hypothetical protein
1277858..1278526	-	222	-	st23_001179	-	Possible exported protein
1278507..1278869	-	120	-	st23_001180	-	FIG00758320: hypothetical protein
1278881..1279246	-	121	-	st23_001181	-	FIG00758350: hypothetical protein
1279243..1279509	-	88	-	st23_001182	-	FIG00758241: hypothetical protein
1279509..1279835	-	108	-	st23_001183	-	FIG00758076: hypothetical protein
1279845..1280477	-	210	-	st23_001184	-	Fe2+/Zn2+ uptake regulation proteins
1280468..1280899	-	143	-	st23_001185	-	FIG00758083: hypothetical protein
1280899..1281720	-	273	-	st23_001186	-	FIG00757914: hypothetical protein
1281713..1282300	-	195	-	st23_001187	-	FIG00759290: hypothetical protein

## Sheet: Region 9
Genome position	Strand	#of aminoacids	Gene name	Gene Identifier	COG#	Annotation
1640932..1642803	+	623	-	st23_001525	-	Chaperone protein HtpG
1642915..1643211	-	98	-	st23_001526	-	DNA-binding protein Fis
1643327..1644481	-	384	-	st23_001527	-	Lipid-A-disaccharide synthase (EC 2.4.1.182)
1644468..1645430	-	320	-	st23_001528	-	Myo-inositol 2-dehydrogenase (EC 1.1.1.18)
1645651..1646226	+	191	-	st23_001529	-	Ribonuclease HII (EC 3.1.26.4)
1646337..1647455	-	372	-	st23_001530	-	Rod shape-determining protein RodA
1647452..1649332	-	626	-	st23_001531	-	Penicillin-binding protein 2 (PBP-2)
1649472..1649942	-	156	-	st23_001532	-	LSU m3Psi1915 methyltransferase RlmH
1649951..1650310	-	119	-	st23_001533	-	Iojap protein
1650394..1651836	-	480	-	st23_001534	-	Di/tripeptide permease DtpT
1652056..1653723	+	555	-	st23_001535	-	Urocanate hydratase (EC 4.2.1.49)
1653650..1655257	+	535	-	st23_001536	-	Histidine ammonia-lyase (EC 4.3.1.3)
1655250..1656659	+	469	-	st23_001537	-	Aldehyde dehydrogenase (EC 1.2.1.3); Probable coniferyl aldehyde dehydrogenase (EC 1.2.1.68)
1656638..1657480	+	280	-	st23_001538	-	Short-chain dehydrogenase/reductase SDR
1657477..1657908	+	143	-	st23_001539	-	Ribonuclease HI (EC 3.1.26.4)
1657859..1658614	+	251	-	st23_001540	-	DNA polymerase III epsilon subunit (EC 2.7.7.7)
1658821..1659198	-	125	-	st23_001541	-	FIG00757861: hypothetical protein
1659490..1659963	+	157	-	st23_001542	-	FIG00758809: hypothetical protein
1659976..1661478	+	500	-	st23_001543	-	FIG00759542: hypothetical protein
1661544..1661963	-	139	-	st23_001544	-	probable iron binding protein from the HesB_IscA_SufA family
1662071..1663156	-	361	-	st23_001545	-	tRNA-specific 2-thiouridylase MnmA
1663426..1663854	+	142	-	st23_001546	-	FIG00760532: hypothetical protein
1663859..1664131	+	90	-	st23_001547	-	LSU ribosomal protein L32p @ LSU ribosomal protein L32p, zinc-independent
1664137..1665165	+	342	-	st23_001548	-	Phosphate:acyl-ACP acyltransferase PlsX
1665162..1666115	+	317	-	st23_001549	-	3-oxoacyl-[acyl-carrier-protein] synthase, KASIII (EC 2.3.1.180)
1666142..1667089	+	315	-	st23_001550	-	Malonyl CoA-acyl carrier protein transacylase (EC 2.3.1.39)
1667101..1667847	+	248	-	st23_001551	-	3-oxoacyl-[acyl-carrier protein] reductase (EC 1.1.1.100)
1667932..1668180	+	82	-	st23_001552	-	Acyl carrier protein
1668200..1669438	+	412	-	st23_001553	-	3-oxoacyl-[acyl-carrier-protein] synthase, KASII (EC 2.3.1.179)
1669439..1670437	+	332	-	st23_001554	-	FIG004453: protein YceG like
1670437..1671075	+	212	-	st23_001555	-	Thymidylate kinase (EC 2.7.4.9)
1671072..1671977	+	301	-	st23_001556	-	DNA polymerase III delta prime subunit (EC 2.7.7.7)
1672088..1672444	+	118	-	st23_001557	-	Type IV pilus biogenesis protein PilZ
1672480..1673292	+	270	-	st23_001558	-	Putative deoxyribonuclease YcfH
1673404..1674504	+	366	-	st23_001559	-	Anhydro-N-acetylmuramic acid kinase (EC 2.7.1.-)
1674560..1675852	+	430	-	st23_001560	-	FIG00758825: hypothetical protein
1675925..1676068	+	47	-	st23_001561	-	hypothetical protein
1676370..1677650	-	426	-	st23_001562	-	Multidrug translocase MdfA
1677809..1679047	+	412	-	st23_001563	-	Glycosyltransferase
1679135..1680520	-	461	-	st23_001564	-	FIG00758684: hypothetical protein
1680610..1681761	+	383	-	st23_001565	-	Choline kinase (EC 2.7.1.32)
