# Supplementary material for: Multiple major disease-associated clones of Legionella pneumophila have emerged recently and independently
Source: Genome Res. 2016 Nov;26(11):1555–64. doi: 10.1101/gr.209536.116 (PMC5088597; doi:10.1101/gr.209536.116)
Supplement: Supplemental Material [file supp_gr.209536.116_Supplemental_Table_S7.xlsx]

## Sheet: Affected taxa
Table S7. Highlighted recombined regions in the SynTView representation of the ST37 lineage.
Region 1	Region 2	Region 3	Region 4	Region 5	Region 6
ST37_5_LC0763	ST37_5_LC0763	ST_37_23_H04164079	ST_37_23_H04164079	ST37_5_LC0763	ST37_3_LC0731
ST37_3_LC0731	ST37_3_LC0731	ST37_15_H041380048	ST37_15_H041380048	ST37_3_LC0731	ST37_59_LC0782
ST37_59_LC0782	ST37_59_LC0782	ST37_49_H111580389	ST37_49_H111580389	ST37_59_LC0782	ST37_63_LC0801
ST37_63_LC0801	ST37_63_LC0801	ST37_35_H10094011	ST37_35_H10094011	ST37_63_LC0801	ST37_61_LC0795
ST37_61_LC0795	ST37_61_LC0795	ST37_38_H102020414	ST37_38_H102020414	ST37_61_LC0795	ST37_4_LC0732
ST37_4_LC0732	ST37_4_LC0732	ST37_28_H084760449	ST37_28_H084760449	ST37_4_LC0732	ST37_27_LC1127
ST37_27_LC1127	ST37_27_LC1127	ST37_14_LC6228	ST37_14_LC6228	ST37_27_LC1127
		ST37_32_H093140322	ST37_32_H093140322	ST_37_23_H04164079
		ST37_33_H093160422	ST37_33_H093160422	ST37_15_H041380048
		ST37_2_H06420448	ST37_2_H06420448	ST37_49_H111580389
		ST37_51_H083920177	ST37_51_H083920177	ST37_35_H10094011
		ST37_52_H084140691	ST37_52_H084140691	ST37_38_H102020414
		ST37_24_LC6788	ST37_24_LC6788	ST37_28_H084760449
		ST37_31_H044260061	ST37_31_H044260061	ST37_14_LC6228
		ST37_16_H042960010	ST37_16_H042960010	ST37_32_H093140322
		ST37_29_H085020185	ST37_29_H085020185	ST37_33_H093160422
		ST37_30_H090320386	ST37_30_H090320386	ST37_2_H06420448
				ST37_51_H083920177
				ST37_52_H084140691
				ST37_24_LC6788
				ST37_31_H044260061
				ST37_16_H042960010
				ST37_29_H085020185
				ST37_30_H090320386

## Sheet: Region 1
Genename	Gene Identifier	COG#	Annotation
-	st37ref0694	-	Major facilitator family transporter
-	st37ref0695	-	Phosphopentomutase
-	st37ref0696	-	ATP-dependent protease subunit HslV
-	st37ref0697	-	ATP-dependent protease ATPase subunit HslU
-	st37ref0698	-	Unknown
-	st37ref0699	-	type IV secretion protein Dot
-	st37ref0700	-	UPF0761 membrane protein LPC_2650
-	st37ref0701	-	Unknown
-	st37ref0702	-	Unknown
-	st37ref0703	-	Structural toxin protein RtxA
-	st37ref0704	-	Structural toxin protein RtxA
-	st37ref0705	-	Trp repressor binding protein
-	st37ref0706	-	Unknown
-	st37ref0707	-	ATP-dependent helicase HrpA
-	st37ref0708	-	Exodeoxyribonuclease III
-	st37ref0709	-	Exodeoxyribonuclease III
-	st37ref0710	-	50S ribosomal protein L31
-	st37ref0711	-	Malate dehydrogenase (Oxaloacetate-decarboxylating) (NADP(+))
-	st37ref0712	-	Major facilitator family transporter
-	st37ref0713	-	Major facilitator family transporter
-	st37ref0714	-	DNA adenine methylase
-	st37ref0715	-	Unknown
-	st37ref0716	-	Tryptophan/tyrosine permease
-	st37ref0717	-	tryptophan/tyrosine permease
-	st37ref0718	-	Outer membrane protein, OmpA family protein
-	st37ref0719	-	Unknown
-	st37ref0720	-	HlyD family secretion protein
-	st37ref0721	-	ABC transporter ElsE
-	st37ref0722	-	ABC transporter permease
-	st37ref0723	-	ABC transporter permease protein
-	st37ref0724	-	RND efflux system, outer membrane lipoprotein, NodT family
-	st37ref0725	-	Soluble lytic murein transglycosylase
-	st37ref0726	-	Ribulose-phosphate 3-epimerase
-	st37ref0727	-	Unknown
-	st37ref0728	-	membrane protein
-	st37ref0729	-	Conserved hypothethical protein
-	st37ref0730	-	PF05114 family protein
-	st37ref0731	-	Probable signal peptide protein
-	st37ref0732	-	Predicted esterase of the alpha-beta hydrolase superfamily
-	st37ref0733	-	NADH dehydrogenase transmembrane protein
-	st37ref0734	-	Acetoacetate decarboxylase
-	st37ref0735	-	Signal peptide protein
-	st37ref0736	-	Adenylate cyclase
-	st37ref0737	-	Conserved hypothethical protein
-	st37ref0738	-	UPF0276 protein GEM_5494
-	st37ref0739	-	Unknown
-	st37ref0740	-	Arginine ABC transporter, periplasmic binding protein
-	st37ref0741	-	Adenylyl transferase
-	st37ref0742	-	Dipeptidyl aminopeptidase/acylaminoacyl peptidase
-	st37ref0743	-	Lipoprotein
-	st37ref0744	-	ABC transporter ATP-binding protein
-	st37ref0745	-	membrane protein
-	st37ref0746	-	Ribosomal protein S12 methylthiotransferase RimO
-	st37ref0747	-	Thiol:disulfide interchange protein DsbD
-	st37ref0748	-	10 kDa chaperonin
-	st37ref0749	-	60 kDa chaperonin
-	st37ref0750	-	DNA binding stress protein
-	st37ref0751	-	spermidine synthase
-	st37ref0752	-	DNA topoisomerase 4 subunit B
-	st37ref0753	-	ABC dipeptide/oligopeptide/nickel transport, ATPase component
-	st37ref0754	-	LigA, interaptin
-	st37ref0755	-	Proline--tRNA ligase
-	st37ref0756	-	Phosphocholine transferase AnkX
-	st37ref0757	-	Phosphocholine hydrolase Lem3
-	st37ref0758	-	Sulfate transporter
-	st37ref0759	-	tRNA 2-thiocytidine biosynthesis protein TtcA
-	st37ref0760	-	Outer membrane protein TolC
-	st37ref0761	-	Protein-L-isoaspartate-O-methyltransferase
-	st37ref0762	-	2-amino-3-ketobutyrate coenzyme A ligase
-	st37ref0763	-	L-threonine 3-dehydrogenase
-	st37ref0764	-	ABC transporter, ABC binding protein
-	st37ref0765	-	enhanced entry protein EnhA
-	st37ref0766	-	Putative transporter component
-	st37ref0767	-	Transporter component
-	st37ref0768	-	(Outer) membrane protein
-	st37ref0769	-	type IV secretion protein IcmL
-	st37ref0770	-	Formimidoylglutamase
-	st37ref0771	-	Sepiapterin reductase
-	st37ref0772	-	Imidazolonepropionase
-	st37ref0773	-	1,4-beta-xylanase
-	st37ref0774	-	peptide transporter
-	st37ref0775	-	Sensor histidine kinase
-	st37ref0776	-	Two component response regulator
-	st37ref0777	-	Unknown
-	st37ref0778	-	NB-ARC domain-containing protein,TIR-like domain-containing protein (DUF1863)
-	st37ref0779	-	Proton/sodium-glutamate symport protein
-	st37ref0780	-	Valine--tRNA ligase
-	st37ref0781	-	Multidrug resistance protein
-	st37ref0782	-	Efflux transporter, RND family, MFP subunit
-	st37ref0783	-	Unknown
-	st37ref0784	-	Unknown
-	st37ref0785	-	transporter n=1
-	st37ref0786	-	Serine hydroxymethyltransferase
-	st37ref0787	-	Transcriptional repressor NrdR
-	st37ref0788	-	N utilization substance protein B homolog
-	st37ref0789	-	Thiamine-monophosphate kinase
-	st37ref0790	-	Phosphatidylglycerophosphatase A
-	st37ref0791	-	Transmembrane permease
-	st37ref0792	-	Putative outer membrane protein
-	st37ref0793	-	Putative outer membrane protein
-	st37ref0794	-	Unknown
-	st37ref0795	-	Glutamine dependent NAD+ synthetase
-	st37ref0796	-	DNA helicase, SNF2/RAD54 family domain protein
-	st37ref0797	-	signal peptide protein
-	st37ref0798	-	Replicative DNA helicase
-	st37ref0799	-	Alanine racemase
-	st37ref0800	-	17 kDa surface antigen
-	st37ref0801	-	Putative signal-transduction protein containing cAMP-binding and CBS domains
-	st37ref0802	-	membrane protein
-	st37ref0803	-	Glutamate synthetase
-	st37ref0804	-	GGDEF domain protein
-	st37ref0805	-	Lipoyl synthase
-	st37ref0806	-	Predicted endonuclease containing a URI domain
-	st37ref0807	-	Di/tripeptide transporter homolog IraB
-	st37ref0808	-	Di/tripeptide transporter homolog IraB
-	st37ref0809	-	Small-molecule methyltransferase IraA
-	st37ref0810	-	LPS biosynthesis protein, PseA-like protein
-	st37ref0811	-	Imidazole glycerol phosphate synthase subunit HisF
-	st37ref0812	-	Imidazole glycerol phosphate synthase subunit HisH 1
-	st37ref0813	-	CMP-N,N'-diacetyllegionaminic acid synthase
-	st37ref0814	-	N,N'-diacetyllegionaminic acid synthase
-	st37ref0815	-	UDP-N,N'-diacetylbacillosamine 2-epimerase (hydrolyzing)
-	st37ref0816	-	Chloramphenicol acetyltransferase
-	st37ref0817	-	Pyridoxal phosphate-dependent enzyme apparently involved in regulation of cell wall biosynthesis
-	st37ref0818	-	dTDP-6-deoxy-D-glucose-3,5-epimerase RmlC
-	st37ref0819	-	dTDP-6-deoxy-L-mannose dehydrogenase RmlD
-	st37ref0820	-	dTDP-glucose 4,6-dehydratase
-	st37ref0821	-	Glucose-6-phosphate isomerase
-	st37ref0822	-	Glucose-1-phosphate thymidylyltransferase
-	st37ref0823	-	NAD dependent epimerase/dehydratase, UDP-glucose-4-epimerase
-	st37ref0824	-	O-antigen initiating glycosyl transferase group 4-UDP-N-acetylmuramyl pentapeptide phosphotransferase/(N-acetylgalactosaminyl transferase TrsF)
-	st37ref0825	-	Unknown
-	st37ref0826	-	Surface adhesion protein
-	st37ref0827	-	Unknown
-	st37ref0828	-	Tetratricopeptide repeat domain 8
-	st37ref0829	-	Unknown
-	st37ref0830	-	Unknown
-	st37ref0831	-	Spore coat polysaccharide biosynthesis protein E (NeuB)
-	st37ref0832	-	methyltransferase

## Sheet: Region 2
Genename	Gene Identifier	COG#	Annotation
-	st37ref1036	-	Putative membrane protein
-	st37ref1037	-	DNA ligase
-	st37ref1038	-	Bacterial extracellular solute-binding protein
-	st37ref1039	-	peptide ABC transporter permease
-	st37ref1040	-	Peptide ABC transporter, permease protein
-	st37ref1041	-	DNA polymerase III, alpha chain
-	st37ref1042	-	type IV secretion protein Dot
-	st37ref1043	-	4-hydroxybenzoate octaprenyltransferase
-	st37ref1044	-	LphB
-	st37ref1045	-	multidrug MFS transporter
-	st37ref1046	-	Unknown
-	st37ref1047	-	Unknown
-	st37ref1048	-	Unknown
-	st37ref1049	-	Amino acid permease
-	st37ref1050	-	multidrug DMT transporter permease
-	st37ref1051	-	proline hydroxylase
-	st37ref1052	-	Transposase (IS652)
-	st37ref1053	-	proline hydroxylase
-	st37ref1054	-	Unknown
-	st37ref1055	-	Gll2498 protein
-	st37ref1056	-	SOS response transcriptional regulator
-	st37ref1057	-	UmuC
-	st37ref1058	-	Unknown
-	st37ref1059	-	Unknown
-	st37ref1060	-	Unknown
-	st37ref1061	-	Unknown
-	st37ref1062	-	Antirestriction protein
-	st37ref1063	-	Single-stranded DNA-binding protein
-	st37ref1064	-	Unknown
-	st37ref1065	-	Unknown
-	st37ref1066	-	Marine sediment metagenome DNA, contig: S01H1_L04127
-	st37ref1067	-	Integrase-like protein
-	st37ref1068	-	integrase
-	st37ref1069	-	Unknown
-	st37ref1070	-	Phage protein
-	st37ref1071	-	Conjugative coupling factor TraD
-	st37ref1072	-	Unknown
-	st37ref1073	-	Unknown
-	st37ref1074	-	Unknown
-	st37ref1075	-	Unknown
-	st37ref1076	-	Conjugative coupling factor TraD
-	st37ref1077	-	Unknown
-	st37ref1078	-	Unknown
-	st37ref1079	-	Membrane protein
-	st37ref1080	-	Membrane protein, Tfp pilus assembly, pilus retraction ATPase PilT
-	st37ref1081	-	Integrating conjugative element protein
-	st37ref1082	-	Type IV secretory protein VirB4 component
-	st37ref1083	-	Putative lipoprotein
-	st37ref1084	-	Exported membrane protein
-	st37ref1085	-	Integrating conjugative element protein family
-	st37ref1086	-	Integrating conjugative element protein
-	st37ref1087	-	Unknown
-	st37ref1088	-	Unknown
-	st37ref1089	-	Unknown
-	st37ref1090	-	conjugal transfer protein
-	st37ref1091	-	membrane protein, partial
-	st37ref1092	-	Putative lipoprotein

## Sheet: Region 3
Genename	Gene Identifier	COG#	Annotation
-	st37ref1092	-	Putative lipoprotein
-	st37ref1093	-	beta-glucosidase
-	st37ref1094	-	Unknown
-	st37ref1095	-	PilL protein
-	st37ref1096	-	Carbon storage regulator homolog (Regulator of secondary metabolites)
-	st37ref1097	-	Legionella vir region protein LvrB2
-	st37ref1098	-	LvrA
-	st37ref1099	-	XRE family transcriptional regulator
-	st37ref1100	-	HelC protein
-	st37ref1101	-	HelB protein 5
-	st37ref1102	-	cation transporter
-	st37ref1103	-	Cadmium translocating P-type ATPase CadA
-	st37ref1104	-	Unknown
-	st37ref1105	-	Unknown
-	st37ref1106	-	Unknown
-	st37ref1107	-	Unknown
-	st37ref1108	-	Cadmium efflux ATPase
-	st37ref1109	-	Uncharacterized conserved protein
-	st37ref1110	-	Unknown
-	st37ref1111	-	Acetyltransferase
-	st37ref1112	-	Possible dehydrogenase
-	st37ref1113	-	dehydrogenase
-	st37ref1114	-	Putative secreted protein
-	st37ref1115	-	Unknown
-	st37ref1116	-	Unknown
-	st37ref1117	-	HAD family hydrolase
-	st37ref1118	-	HAD family hydrolase
-	st37ref1119	-	Chemiosmotic efflux system B protein C
-	st37ref1120	-	Chemiosmotic efflux system B protein B
-	st37ref1121	-	Chemiosmotic efflux system B protein A
-	st37ref1122	-	Metallo-beta lactamase family
-	st37ref1123	-	Putative thymidine phosphorylase
-	st37ref1124	-	Ribose-phosphate pyrophosphokinase
-	st37ref1125	-	Unknown
-	st37ref1126	-	haloacid dehalogenase
-	st37ref1127	-	Diguanylate kinase
-	st37ref1128	-	membrane protein
-	st37ref1129	-	Chemiosmotic efflux system C protein C
-	st37ref1130	-	Chemiosmotic efflux system C protein B
-	st37ref1131	-	Chemiosmotic efflux system protein A-like protein
-	st37ref1132	-	Chemiosmotic efflux system C protein A
-	st37ref1133	-	Unknown
-	st37ref1134	-	poly(3-hydroxyalkanoate) synthetase
-	st37ref1135	-	Unknown
-	st37ref1136	-	Unknown
-	st37ref1137	-	Putative uncharacterized domain protein
-	st37ref1138	-	copper oxidase
-	st37ref1139	-	Outer membrane lipoprotein
-	st37ref1140	-	Unknown
-	st37ref1141	-	Unknown
-	st37ref1142	-	VrrB
-	st37ref1143	-	membrane protein
-	st37ref1144	-	isoprenylcysteine carboxyl methyltransferase
-	st37ref1145	-	Unknown
-	st37ref1146	-	Putative secreted protein
-	st37ref1147	-	Putative membrane protein
-	st37ref1148	-	Oxidoreductase, FAD-binding
-	st37ref1149	-	Unknown
-	st37ref1150	-	F-type H-transporting ATPase gamma chain
-	st37ref1151	-	ATP synthase subunit alpha 1
-	st37ref1152	-	ATP synthase subunit b
-	st37ref1153	-	ATP synthase C subunit (H+ transporting ATP synthase)
-	st37ref1154	-	ATP synthase subunit a
-	st37ref1155	-	Unknown
-	st37ref1156	-	ATP synthase, putative
-	st37ref1157	-	ATP synthase F0F1 subunit epsilon
-	st37ref1158	-	ATP synthase F0F1 subunit beta
-	st37ref1159	-	Substrate of the Dot/Icm secretion system
-	st37ref1160	-	XRE family transcriptional regulator
-	st37ref1161	-	Guanylate cyclase
-	st37ref1162	-	Sensory box/GGDEF family
-	st37ref1163	-	Polyhydroxyalkanoic synthase
-	st37ref1164	-	Acetoacetyl CoA reductase
-	st37ref1165	-	Cold shock domain family protein
-	st37ref1166	-	TPR repeat protein
-	st37ref1167	-	Proline/betaine transporter ProP6
-	st37ref1168	-	Peptide deformylase
-	st37ref1169	-	flagellar rod assembly protein FlgJ
-	st37ref1170	-	transcription factor
-	st37ref1171	-	Unknown
-	st37ref1172	-	Prophage regulatory protein-like protein
-	st37ref1173	-	AbiD phage protein-like
-	st37ref1174	-	Integrase, phage related
-	st37ref1175	-	Unknown
-	st37ref1176	-	Protein MurJ homolog
-	st37ref1177	-	GNAT family acetyltransferase
-	st37ref1178	-	Methyltransferase
-	st37ref1179	-	Putative transposase
-	st37ref1180	-	cell division protein Fic
-	st37ref1181	-	Unknown
-	st37ref1182	-	Beta-phosphoglucomutase
-	st37ref1183	-	Cation efflux transporter
-	st37ref1184	-	Cation efflux transporter
-	st37ref1185	-	Chemiosmotic efflux system B protein C
-	st37ref1186	-	Chemiosmotic efflux system B protein B
-	st37ref1187	-	Chemiosmotic efflux system B protein A
-	st37ref1188	-	Copper transporting P-type ATPase
-	st37ref1189	-	Polyhydroxyalkanoic synthase
-	st37ref1190	-	Unknown
-	st37ref1191	-	Unknown
-	st37ref1192	-	membrane protein
-	st37ref1193	-	ABC-type transport system, permease component
-	st37ref1194	-	Unknown
-	st37ref1195	-	Multifunctional virulence effector protein DrrA
-	st37ref1196	-	x
-	st37ref1197	-	Putative secreted protein
-	st37ref1198	-	Putative aminoglycoside phosphotransferase
-	st37ref1199	-	Methionine sulfoxide reductase B
-	st37ref1200	-	Unknown
-	st37ref1201	-	transporter
-	st37ref1202	-	lipase
-	st37ref1203	-	Unknown
-	st37ref1204	-	Unknown
-	st37ref1205	-	Unknown
-	st37ref1206	-	Unknown
-	st37ref1207	-	Unknown
-	st37ref1208	-	Amine oxidase domain protein
-	st37ref1209	-	Sensory box protein (GGDEF domain/EAL domain)
-	st37ref1210	-	circadian clock protein KaiB
-	st37ref1211	-	DNA integration/recombination/inversion protein
-	st37ref1212	-	Chitinase 5
-	st37ref1213	-	Unknown
-	st37ref1214	-	Serine-type D-Ala-D-Ala carboxypeptidase
-	st37ref1215	-	Major acid phosphatase Map (Histidine-acid phosphatase)
-	st37ref1216	-	Putative eukaryotic thiol (Cysteine) protease family protein
-	st37ref1217	-	Unknown
-	st37ref1218	-	Unknown
-	st37ref1219	-	Putative coiled-coil protein
-	st37ref1220	-	Membrane bound lytic murein transglycosylase D
-	st37ref1221	-	Peb1 (Arginine binding periplasmic protein)
-	st37ref1222	-	Unknown
-	st37ref1223	-	Unknown
-	st37ref1224	-	Cystine/glutamine-binding periplasmic protein
-	st37ref1225	-	Calcium-transporting ATPase
-	st37ref1226	-	Long-chain acyl-CoA synthetase
-	st37ref1227	-	Guanine deaminase (Guanase) (Guanine aminase) (Guanine aminohydrolase) (GAH) (GDEase)
-	st37ref1228	-	Unknown
-	st37ref1229	-	Adenylate cyclase
-	st37ref1230	-	Unknown
-	st37ref1231	-	Cyclopropane fatty acyl phospholipid synthase (Unsaturated-phospholipid methyltransferase)
-	st37ref1232	-	Unknown
-	st37ref1233	-	nitronate monooxygenase
-	st37ref1234	-	TetR family transcriptional regulator
-	st37ref1235	-	Putative coiled-coil protein
-	st37ref1236	-	Unknown
-	st37ref1237	-	Unknown
-	st37ref1238	-	Putrescine-binding periplasmic protein
-	st37ref1239	-	Polyamine transporter subunit membrane component of ABC superfamily
-	st37ref1240	-	Spermidine/putrescine ABC transporter permease PotB
-	st37ref1241	-	Spermidine/putrescine import ATP-binding protein PotA
-	st37ref1242	-	Excinuclease ABC C subunit domain protein
-	st37ref1243	-	Unknown
-	st37ref1244	-	Short chain type dehydrogenase/reductase
-	st37ref1245	-	type IV secretion protein Dot
-	st37ref1246	-	ankyrin
-	st37ref1247	-	Thermostable carboxypeptidase 1
-	st37ref1248	-	GCN5-related N-acetyltransferase
-	st37ref1249	-	type IV secretion protein Dot
-	st37ref1250	-	Unknown
-	st37ref1251	-	Transcription regulator protein
-	st37ref1252	-	Unknown
-	st37ref1253	-	Unknown
-	st37ref1254	-	Flavin-containing amine oxidase family protein
-	st37ref1255	-	Unknown
-	st37ref1256	-	Pyruvate decarboxylase
-	st37ref1257	-	Aminopeptidase
-	st37ref1258	-	Lipase B
-	st37ref1259	-	type IV secretion protein Dot
-	st37ref1260	-	Unknown
-	st37ref1261	-	Permease of drug/transporter
-	st37ref1262	-	Phosphoribosyltransferase
-	st37ref1263	-	OmpA-like transmembrane domain protein
-	st37ref1264	-	MFS transporter
-	st37ref1265	-	Acetylornithine deacetylase
-	st37ref1266	-	Unknown
-	st37ref1267	-	Uridine kinase
-	st37ref1268	-	Some similarity with eukaryotic proteins
-	st37ref1269	-	UPF0234 protein lpg1167
-	st37ref1270	-	EAL domain protein
-	st37ref1271	-	dioxygenase
-	st37ref1272	-	Pyruvate formate lyase-activating enzyme PflA
-	st37ref1273	-	Unknown
-	st37ref1274	-	TPR repeat protein
-	st37ref1275	-	Sensor protein PilS
-	st37ref1276	-	chemotaxis protein CheY
-	st37ref1277	-	Unknown
-	st37ref1278	-	Alpha/beta hydrolase fold
-	st37ref1279	-	Zn-dependent protease
-	st37ref1280	-	Riboflavin biosynthesis protein RibD
-	st37ref1281	-	Riboflavin synthase alpha chain
-	st37ref1282	-	Riboflavin biosynthesis protein RibBA
-	st37ref1283	-	6,7-dimethyl-8-ribityllumazine synthase
-	st37ref1284	-	CTP synthase
-	st37ref1285	-	2-dehydro-3-deoxyphosphooctonate aldolase
-	st37ref1286	-	Unknown
-	st37ref1287	-	Outer membrane protein RomA
-	st37ref1288	-	Outer membrane protein assembly factor BamD
-	st37ref1289	-	Exonuclease involved in removal of stalled replication fork
-	st37ref1290	-	Probable potassium transport system protein kup 1

## Sheet: Region 4
Genename	Gene Identifier	COG#	Annotation
-	st37ref1851	-	Ribonucleoside-diphosphate reductase
-	st37ref1852	-	Ribonucleoside-diphosphate reductase subunit beta
-	st37ref1853	-	Unknown
-	st37ref1854	-	Lysine--tRNA ligase
-	st37ref1855	-	Peptide chain release factor 2
-	st37ref1856	-	Unknown
-	st37ref1857	-	flagellar motor protein MotD
-	st37ref1858	-	Flagellar motor protein MotA
-	st37ref1859	-	RNA polymerase sigma factor FliA
-	st37ref1860	-	Site-determining protein
-	st37ref1861	-	Flagellar GTP-binding protein FlhF
-	st37ref1862	-	Flagellar biosynthesis protein flhA
-	st37ref1863	-	Flagellar biosynthetic protein FlhB
-	st37ref1864	-	Flagellar biosynthetic protein FliR
-	st37ref1865	-	Unknown
-	st37ref1866	-	Flagellar biosynthetic protein FliQ
-	st37ref1867	-	Flagellar biosynthetic protein FliP
-	st37ref1868	-	Flagellar protein fliO n=15

## Sheet: Region 5
Genename	Gene Identifier	COG#	Annotation
-	st37ref2110	-	Adenosylhomocysteinase
-	st37ref2111	-	S-adenosylmethionine synthase
-	st37ref2112	-	Carbamoyl-phosphate synthase small chain
-	st37ref2113	-	Chaperone protein DnaJ
-	st37ref2114	-	Chaperone protein DnaK
-	st37ref2115	-	Protein GrpE
-	st37ref2116	-	2-keto-3-deoxy-D-arabino-heptulosonate 7-phosphate synthase
-	st37ref2117	-	Uroporphyrinogen decarboxylase
-	st37ref2118	-	Bifunctioal dihydroneopterin aldolase dihydroneopterin triphosphate 2'-epimerase
-	st37ref2119	-	cell division protein FtsN
-	st37ref2120	-	Arginine--tRNA ligase
-	st37ref2121	-	Transporter, permease
-	st37ref2122	-	ATP-dependent DNA helicase RecG
-	st37ref2123	-	Cation efflux family protein
-	st37ref2124	-	zinc transporter
-	st37ref2125	-	Maf-like protein LPC_1522
-	st37ref2126	-	Enolase
-	st37ref2127	-	Cell division protein FtsB
-	st37ref2128	-	mevalonate kinase
-	st37ref2129	-	Mevalonate diphosphate decarboxylase
-	st37ref2130	-	7-carboxy-7-deazaguanine synthase
-	st37ref2131	-	membrane protein
-	st37ref2132	-	Peptidoglycan-associated lipoprotein
-	st37ref2133	-	ABC-typetransport system, auxiliary component
-	st37ref2134	-	ABC transport system periplasmic substrate binding protein
-	st37ref2135	-	ABC transporter, ATP binding protein
-	st37ref2136	-	ABC transporter permease
-	st37ref2137	-	Unknown
-	st37ref2138	-	Unknown
-	st37ref2139	-	Unknown
-	st37ref2140	-	Isopentenyl-diphosphate delta-isomerase
-	st37ref2141	-	Hydroxymethylglutaryl CoA reductase
-	st37ref2142	-	Unknown
-	st37ref2143	-	Unknown
-	st37ref2144	-	Unknown
-	st37ref2145	-	Prophage integrase
-	st37ref2146	-	MULTISPECIES: MerR family transcriptional regulator
-	st37ref2147	-	Unknown
-	st37ref2148	-	Unknown
-	st37ref2149	-	Methylase
-	st37ref2150	-	Acetyltransferase, including N-acetylases of ribosomal protein
-	st37ref2151	-	Unknown
-	st37ref2152	-	transporter
-	st37ref2153	-	x
-	st37ref2154	-	Acetoacetyl-CoA reductase
-	st37ref2155	-	Cold shock domain family protein
-	st37ref2156	-	Unknown
-	st37ref2157	-	response regulator receiver protein
-	st37ref2158	-	Chemiosmotic efflux system C protein A
-	st37ref2159	-	Unknown
-	st37ref2160	-	Lead, cadmium, zinc and mercury transporting ATPase
-	st37ref2161	-	Putative virion core protein (Lumpy skin disease virus)
-	st37ref2162	-	Transcriptional regulator, ArsR family
-	st37ref2163	-	Unknown
-	st37ref2164	-	Unknown
-	st37ref2165	-	Protein HelA 7
-	st37ref2166	-	HelB protein
-	st37ref2167	-	HelC
-	st37ref2168	-	Enoyl-[acyl-carrier-protein] reductase [NADH]
-	st37ref2169	-	Acetate kinase
-	st37ref2170	-	Phosphate acetyltransferase
-	st37ref2171	-	Polyhydroxyalkanoic acid synthase
-	st37ref2172	-	Unknown
-	st37ref2173	-	TPR repeat protein
-	st37ref2174	-	Chemiosmotic efflux system C protein A
-	st37ref2175	-	Chemiosmotic efflux system protein A-like protein
-	st37ref2176	-	Putative Co/Zn/Cd efflux system membrane fusion protein
-	st37ref2177	-	Heavy metal RND efflux outer membrane protein, CzcC family
-	st37ref2178	-	membrane protein
-	st37ref2179	-	Diguanylate cyclase/phosphodiesterase (GGDEF & EAL domains) with PAS/PAC sensor(S)
-	st37ref2180	-	Lead, cadmium, zinc and mercury transporting ATPase
-	st37ref2181	-	Unknown
-	st37ref2182	-	Ribose-phosphate pyrophosphokinase
-	st37ref2183	-	Putative thymidine phosphorylase
-	st37ref2184	-	Metallo-beta-lactamase family protein, RNA-specific
-	st37ref2185	-	Chemiosmotic efflux system B protein A 6
-	st37ref2186	-	PTS cellobiose transporter subunit IIB
-	st37ref2187	-	Unknown
-	st37ref2188	-	PTS cellobiose transporter subunit IIC
-	st37ref2189	-	Cation efflux transporter
-	st37ref2190	-	Unknown
-	st37ref2191	-	Unknown
-	st37ref2192	-	Heavy metal-associated domain protein
-	st37ref2193	-	repressor
-	st37ref2194	-	Legionella vir region protein
-	st37ref2195	-	LvrB homolog
-	st37ref2196	-	Global regulator
-	st37ref2197	-	LvhB11
-	st37ref2198	-	Conjugal transfer protein trbC
-	st37ref2199	-	Conjugal transfer protein trbD
-	st37ref2200	-	Conjugal transfer protein trbE
-	st37ref2201	-	Conjugal transfer protein trbF
-	st37ref2202	-	Conjugal transfer protein trbG
-	st37ref2203	-	Conjugative transfer protein TrbH
-	st37ref2204	-	Conjugal transfer protein trbI
-	st37ref2205	-	Conjugal transfer protein trbJ
-	st37ref2206	-	Conjugative transfer protein TrbL
-	st37ref2207	-	Conjugal transfer protein traG
-	st37ref2208	-	Plasmid transfer protein traF
-	st37ref2209	-	Protein traD
-	st37ref2210	-	DNA primase traC
-	st37ref2211	-	Unknown
-	st37ref2212	-	TraI
-	st37ref2213	-	TraJ protein
-	st37ref2214	-	TraK
-	st37ref2215	-	TraL protein
-	st37ref2216	-	TraM protein
-	st37ref2217	-	PF11074 domain protein

## Sheet: Region 6
Genename	Gene Identifier	COG#	Annotation
-	st37ref2800	-	Carbamoyl-phosphate synthase large subunit
-	st37ref2801	-	Unknown
-	st37ref2802	-	membrane protein
-	st37ref2803	-	membrane protein
-	st37ref2804	-	Unknown
-	st37ref2805	-	Permease
-	st37ref2806	-	permease
-	st37ref2807	-	Probable cytosol aminopeptidase
-	st37ref2808	-	DNA polymerase III subunit chi
-	st37ref2809	-	Unknown
-	st37ref2810	-	cytochrome C oxidase subunit II
-	st37ref2811	-	Protein MurJ homolog
-	st37ref2812	-	30S ribosomal protein S20
-	st37ref2813	-	Unknown
-	st37ref2814	-	Unknown
-	st37ref2815	-	Unknown
-	st37ref2816	-	Enhanced entry protein EnhC
-	st37ref2817	-	Enhanced entry protein EnhB
-	st37ref2818	-	Enhanced entry protein EnhA
-	st37ref2819	-	diguanylate cyclase
-	st37ref2820	-	Unknown
-	st37ref2821	-	Tail fiber protein
-	st37ref2822	-	UvrABC system protein C
-	st37ref2823	-	Response regulator GacA
-	st37ref2824	-	Phenylalanine-4-hydroxylase
-	st37ref2825	-	competence protein
-	st37ref2826	-	GTPase Obg
-	st37ref2827	-	50S ribosomal protein L27
-	st37ref2828	-	50S ribosomal protein L21
-	st37ref2829	-	50S ribosomal protein L25
