# Supplementary material for: Multiple major disease-associated clones of Legionella pneumophila have emerged recently and independently
Source: Genome Res. 2016 Nov;26(11):1555–64. doi: 10.1101/gr.209536.116 (PMC5088597; doi:10.1101/gr.209536.116)
Supplement: Supplemental Material [file supp_gr.209536.116_Supplemental_Table_S8.xlsx]

## Sheet: Affected taxa
Table S8. Highlighted recombined regions in the SynTView representation of the ST62 lineage.
Region 1	Region 2	Region 3	Region 4	Region 5	Region 6	Region 7	Region 8	Region 9
ST62_2_H043540106	ST62_10_H063760005	ST62_19_H064180019	ST62_2_H043540106	ST62_2_H043540106	ST62_10_H063760005	ST62_2_H043540106	ST62_2_H043540106	ST62_2_H043540106
ST62_3_H044120014	ST62_11_H064240003		ST62_3_H044120014	ST62_3_H044120014	ST62_11_H064240003	ST62_3_H044120014	ST62_3_H044120014	ST62_3_H044120014
ST62_4_H052780022	ST62_17_LC6009		ST62_4_H052780022	ST62_4_H052780022	ST62_17_LC6009	ST62_4_H052780022	ST62_4_H052780022	ST62_4_H052780022
ST62_5_H054280040	ST62_25_H114100406		ST62_5_H054280040	ST62_5_H054280040	ST62_25_H114100406	ST62_5_H054280040	ST62_5_H054280040	ST62_5_H054280040
ST62_6_H063680003	ST62_31_EUL00054		ST62_6_H063680003	ST62_6_H063680003	ST62_31_EUL00054	ST62_6_H063680003	ST62_6_H063680003	ST62_6_H063680003
ST62_7_H063840008	ST62_32_EUL00057		ST62_7_H063840008	ST62_7_H063840008	ST62_32_EUL00057	ST62_7_H063840008	ST62_7_H063840008	ST62_7_H063840008
ST62_8_H073660582			ST62_8_H073660582	ST62_8_H073660582		ST62_8_H073660582	ST62_8_H073660582	ST62_8_H073660582
ST62_9_LC5804			ST62_9_LC5804	ST62_9_LC5804		ST62_9_LC5804	ST62_9_LC5804	ST62_9_LC5804
ST62_10_H063760005			ST62_10_H063760005	ST62_10_H063760005		ST62_10_H063760005	ST62_10_H063760005	ST62_10_H063760005
ST62_11_H064240003			ST62_11_H064240003	ST62_11_H064240003		ST62_11_H064240003	ST62_11_H064240003	ST62_11_H064240003
ST62_12_H065040012			ST62_12_H065040012	ST62_12_H065040012		ST62_12_H065040012	ST62_12_H065040012	ST62_12_H065040012
ST62_13_H070140635			ST62_13_H070140635	ST62_13_H070140635		ST62_13_H070140635	ST62_13_H070140635	ST62_13_H070140635
ST62_14_H073020039			ST62_14_H073020039	ST62_14_H073020039		ST62_14_H073020039	ST62_14_H073020039	ST62_14_H073020039
ST62_15_H073320399			ST62_15_H073320399	ST62_15_H073320399		ST62_15_H073320399	ST62_15_H073320399	ST62_15_H073320399
ST62_16_H073440003			ST62_16_H073440003	ST62_16_H073440003		ST62_16_H073440003	ST62_16_H073440003	ST62_16_H073440003
ST62_17_LC6009			ST62_17_LC6009	ST62_17_LC6009		ST62_17_LC6009	ST62_17_LC6009	ST62_17_LC6009
ST62_18_H083140015			ST62_18_H083140015	ST62_18_H083140015		ST62_18_H083140015	ST62_18_H083140015	ST62_18_H083140015
ST62_19_H064180019			ST62_19_H064180019	ST62_19_H064180019		ST62_19_H064180019	ST62_19_H064180019	ST62_19_H064180019
ST62_20_H093400182			ST62_20_H093400182	ST62_20_H093400182		ST62_20_H093400182	ST62_20_H093400182	ST62_20_H093400182
ST62_21_H094760070			ST62_21_H094760070	ST62_21_H094760070		ST62_21_H094760070	ST62_21_H094760070	ST62_21_H094760070
ST62_22_H094760070			ST62_22_H094760070	ST62_22_H094760070		ST62_22_H094760070	ST62_22_H094760070	ST62_22_H094760070
ST62_23_H110480715			ST62_23_H110480715	ST62_23_H110480715		ST62_23_H110480715	ST62_23_H110480715	ST62_23_H110480715
ST62_24_H112840293			ST62_24_H112840293	ST62_24_H112840293		ST62_24_H112840293	ST62_24_H112840293	ST62_24_H112840293
ST62_25_H114100406			ST62_25_H114100406	ST62_25_H114100406		ST62_25_H114100406	ST62_25_H114100406	ST62_25_H114100406
ST62_26_H120240362			ST62_26_H120240362	ST62_26_H120240362		ST62_26_H120240362	ST62_26_H120240362	ST62_26_H120240362
ST62_27_H104640262			ST62_27_H104640262	ST62_27_H104640262		ST62_27_H104640262	ST62_27_H104640262	ST62_27_H104640262
ST62_28_H123140428			ST62_28_H123140428	ST62_28_H123140428		ST62_28_H123140428	ST62_28_H123140428	ST62_28_H123140428
ST62_29_H123460520			ST62_29_H123460520	ST62_29_H123460520		ST62_29_H123460520	ST62_29_H123460520	ST62_29_H123460520
ST62_30_H124360642			ST62_30_H124360642	ST62_30_H124360642		ST62_30_H124360642	ST62_30_H124360642	ST62_30_H124360642
ST62_31_EUL00054			ST62_31_EUL00054	ST62_31_EUL00054		ST62_31_EUL00054	ST62_31_EUL00054	ST62_31_EUL00054
ST62_32_EUL00057			ST62_32_EUL00057	ST62_32_EUL00057		ST62_32_EUL00057	ST62_32_EUL00057	ST62_32_EUL00057
ST62_33_EUL00071			ST62_33_EUL00071	ST62_33_EUL00071		ST62_33_EUL00071	ST62_33_EUL00071	ST62_33_EUL00071
ST62_34_EUL00076			ST62_34_EUL00076	ST62_34_EUL00076		ST62_34_EUL00076	ST62_34_EUL00076	ST62_34_EUL00076
ST62_35_EUL00077			ST62_35_EUL00077	ST62_35_EUL00077		ST62_35_EUL00077	ST62_35_EUL00077	ST62_35_EUL00077

## Sheet: Region 1 
Genename	Gene Identifier	COG#	Annotation
-	st62ref0108	-	Glyceraldehyde-3-phosphate dehydrogenase
-	st62ref0109	-	Transketolase
-	st62ref0110	-	Unknown
-	st62ref0111	-	Oligopeptidase A
-	st62ref0112	-	Marine sediment metagenome DNA, contig: S03H2_C03667 (Fragment)
-	st62ref0113	-	Marine sediment metagenome DNA, contig: S06H3_C04928 (Fragment)
-	st62ref0114	-	CRISPR-associated large protein (Provisional), putative
-	st62ref0115	-	CRISPR-associated endonuclease Cas1
-	st62ref0116	-	CRISPR-associated endoribonuclease Cas2
-	st62ref0117	-	CRISPR-associated protein Cas4
-	st62ref0118	-	Unknown
-	st62ref0119	-	Unknown
-	st62ref0120	-	Unknown
-	st62ref0121	-	Unknown
-	st62ref0122	-	Unknown
-	st62ref0123	-	Unknown
-	st62ref0124	-	repressor
-	st62ref0125	-	Legionella vir region protein
-	st62ref0126	-	LvrB
-	st62ref0127	-	Carbon storage regulator
-	st62ref0128	-	Legionella vir homologue protein
-	st62ref0129	-	Legionella vir homologue protein
-	st62ref0130	-	Legionella vir homologue protein B5
-	st62ref0131	-	Legionella vir region protein
-	st62ref0132	-	Legionella vir homologue protein
-	st62ref0133	-	Legionella vir homologue protein
-	st62ref0134	-	Legionella vir homologue protein
-	st62ref0135	-	Legionella vir homologue protein
-	st62ref0136	-	LvhB11
-	st62ref0137	-	LvhD4
-	st62ref0138	-	Legionella vir region protein
-	st62ref0139	-	Unknown
-	st62ref0140	-	ATPase AAA
-	st62ref0141	-	Unknown
-	st62ref0142	-	conjugal transfer protein TraD
-	st62ref0143	-	Marine sediment metagenome DNA, contig: S06H3_L05272
-	st62ref0144	-	Unknown
-	st62ref0145	-	cytidine deaminase
-	st62ref0146	-	membrane protein
-	st62ref0147	-	Unknown
-	st62ref0148	-	Unknown
-	st62ref0149	-	Repressor protein C2
-	st62ref0150	-	Unknown
-	st62ref0151	-	Phage excisionase
-	st62ref0152	-	Putative lambdoid prophage Rac integrase
-	st62ref0153	-	Unknown
-	st62ref0154	-	ATPase
-	st62ref0155	-	SMF protein
-	st62ref0156	-	ShosT
-	st62ref0157	-	Putative transcriptional regulator
-	st62ref0158	-	metal-dependent hydrolase
-	st62ref0159	-	Putative type I restriction enzyme
-	st62ref0160	-	Putative ATP-dependent DNA helicase protein
-	st62ref0161	-	Unknown
-	st62ref0162	-	Type I restriction modification DNA specificity domain protein
-	st62ref0163	-	type I restriction-modification protein subunit M
-	st62ref0164	-	Restriction endonuclease subunit S
-	st62ref0165	-	Unknown
-	st62ref0166	-	Unknown
-	st62ref0167	-	Transposase Is4
-	st62ref0168	-	Transposase, IS4
-	st62ref0169	-	Unknown
-	st62ref0170	-	Unknown
-	st62ref0171	-	Unknown
-	st62ref0172	-	Unknown
-	st62ref0173	-	toxin RelE, partial
-	st62ref0174	-	Unknown
-	st62ref0175	-	Phage-related protein
-	st62ref0176	-	Conserved small protein
-	st62ref0177	-	Unknown
-	st62ref0178	-	Unknown
-	st62ref0179	-	GNAT family acetyltraansferase
-	st62ref0180	-	Unknown
-	st62ref0181	-	Putative eukaryotic thiol (Cysteine) protease family protein
-	st62ref0182	-	Unknown
-	st62ref0183	-	histidine kinase
-	st62ref0184	-	Signal transduction protein (EAL/GGDEF domain protein)
-	st62ref0185	-	Methionine aminopeptidase
-	st62ref0186	-	Uncharacterized conserved protein
-	st62ref0187	-	Unknown
-	st62ref0188	-	Unknown
-	st62ref0189	-	Beta-lactamase-like protein
-	st62ref0190	-	Hypothetical cytosolic protein
-	st62ref0191	-	Hydrolase of the alpha/beta superfamily
-	st62ref0192	-	Ankyrin repeat domain protein
-	st62ref0193	-	Peptidase propeptide and ypeb domain-containing protein
-	st62ref0194	-	membrane protein
-	st62ref0195	-	Unknown
-	st62ref0196	-	Peptide chain release factor
-	st62ref0197	-	Putative lipoprotein
-	st62ref0198	-	membrane protein
-	st62ref0199	-	ABC transporter permease
-	st62ref0200	-	type IV secretion protein Dot
-	st62ref0201	-	Unknown
-	st62ref0202	-	LysR family transcriptional regulator
-	st62ref0203	-	Pyoverdine biosynthesis protein PvcA
-	st62ref0204	-	Pyoverdine biosynthesis protein PvcB
-	st62ref0205	-	FAD binding domain protein
-	st62ref0206	-	MFS transporter
-	st62ref0207	-	ATP-binding protein
-	st62ref0208	-	methyltransferase
-	st62ref0209	-	Protease HtpX
-	st62ref0210	-	Unknown
-	st62ref0211	-	Unknown
-	st62ref0212	-	Unknown
-	st62ref0213	-	type IV secretion protein Dot
-	st62ref0214	-	Amine oxidase, flavin containing
-	st62ref0215	-	ABC sugar transporter, periplasmic sugar binding protein
-	st62ref0216	-	ABC sugar transporter, ATP binding protein
-	st62ref0217	-	ABC sugar transporter, permease
-	st62ref0218	-	Zinc metalloprotein
-	st62ref0219	-	Acyl CoA transferase/carnitine dehydratase
-	st62ref0220	-	Unknown
-	st62ref0221	-	Unknown
-	st62ref0222	-	Catalase-peroxidase 2
-	st62ref0223	-	Unknown
-	st62ref0224	-	Coiled-coil protein
-	st62ref0225	-	UPF0145 protein lpp0255
-	st62ref0226	-	Cytochrome D ubiquinol oxidase subunit I
-	st62ref0227	-	Cytochrome D ubiquinol oxidase subunit II, cyanide insensitive
-	st62ref0228	-	membrane protein
-	st62ref0229	-	membrane protein
-	st62ref0230	-	Fatty acid-binding protein DegV
-	st62ref0231	-	2-deoxy-D-gluconate 3-dehydrogenase
-	st62ref0232	-	deoxyribodipyrimidine photolyase
-	st62ref0233	-	membrane protein
-	st62ref0234	-	Serine/threonine-protein kinase
-	st62ref0235	-	Serine/threonine-protein kinase
-	st62ref0236	-	Unknown
-	st62ref0237	-	Deoxyribodipyrimidine photolyase
-	st62ref0238	-	Inner membrane protein, LrgB family protein
-	st62ref0239	-	Holin-like protein
-	st62ref0240	-	Transcriptional regulator, LysR family
-	st62ref0241	-	Unknown
-	st62ref0242	-	Phosphoribosylaminoimidazole carboxylase, ATPase subunit
-	st62ref0243	-	N5-carboxyaminoimidazole ribonucleotide mutase
-	st62ref0244	-	Glr2085 protein
-	st62ref0245	-	nitrogen regulatory protein P-II
-	st62ref0246	-	UPF0753 protein lpg0221
-	st62ref0247	-	NADH dehydrogenase subunit 5
-	st62ref0248	-	Transcriptional regulator, LysR family
-	st62ref0249	-	Toxin secretion ABC transporter-like protein
-	st62ref0250	-	Putative RND efflux membrane fusion proteins
-	st62ref0251	-	Multidrug efflux protein, outer membrane component
-	st62ref0252	-	type IV secretion protein Dot
-	st62ref0253	-	Amino acid permease family protein
-	st62ref0254	-	Heme oxygenase
-	st62ref0255	-	Unknown
-	st62ref0256	-	Transposase
-	st62ref0257	-	Sensor histidine kinase
-	st62ref0258	-	Heavy metal transporting P-type ATPase, cation transporting
-	st62ref0259	-	Transcriptional regulator np20, Fur family
-	st62ref0260	-	Benzoylformate decarboxylase
-	st62ref0261	-	Sid related protein-like protein
-	st62ref0262	-	Glutathione-dependent formaldehyde-activating protein
-	st62ref0263	-	Unknown
-	st62ref0264	-	lipolytic protein
-	st62ref0265	-	betaine-aldehyde dehydrogenase
-	st62ref0266	-	4-aminobutyrate aminotransferase
-	st62ref0267	-	Putative serine/threonine protein kinase
-	st62ref0268	-	Glutaminase
-	st62ref0269	-	D-3-phosphoglycerate dehydrogenase
-	st62ref0270	-	Short chain dehydrogenase
-	st62ref0271	-	pyridine nucleotide-disulfide oxidoreductase
-	st62ref0272	-	NAD-glutamate dehydrogenase
-	st62ref0273	-	Unknown
-	st62ref0274	-	Unknown
-	st62ref0275	-	Arsenate reductase
-	st62ref0276	-	Stearoyl CoA 9-desaturase
-	st62ref0277	-	ATP-dependent RNA helicase, DEAD box family
-	st62ref0278	-	RNA binding protein, cold-inducible rrm
-	st62ref0279	-	Unknown
-	st62ref0280	-	Membrane protein
-	st62ref0281	-	Acetyltransferase, GNAT family
-	st62ref0282	-	Unknown
-	st62ref0283	-	Unknown
-	st62ref0284	-	Outer membrane channel protein
-	st62ref0285	-	membrane protein
-	st62ref0286	-	Multidrug resistance secretion protein SdeA
-	st62ref0287	-	Unknown
-	st62ref0288	-	Marine sediment metagenome DNA, contig: S01H1_S01263 (Fragment)
-	st62ref0289	-	Unknown
-	st62ref0290	-	Unknown
-	st62ref0291	-	DNA polymerase
-	st62ref0292	-	MFS transporter family protein
-	st62ref0293	-	Unknown
-	st62ref0294	-	N-acetylmuramoyl-L-alanine amidase
-	st62ref0295	-	Unknown
-	st62ref0296	-	Unknown
-	st62ref0297	-	Unknown
-	st62ref0298	-	multicopper oxidase
-	st62ref0299	-	Unknown
-	st62ref0300	-	Magnesium and cobalt transport protein CorA
-	st62ref0301	-	Putative hydrolases of HD superfamily
-	st62ref0302	-	ATPase
-	st62ref0303	-	Nicotinate phosphoribosyltransferase
-	st62ref0304	-	Bifunctional pyrazinamidase/nicotinamidase
-	st62ref0305	-	Glyoxalase/bleomycin resistance protein/dioxygenase
-	st62ref0306	-	Major facilitator superfamily transporter
-	st62ref0307	-	LysR family transcriptional regulator
-	st62ref0308	-	SdbA
-	st62ref0309	-	Ras GEF/LegG2
-	st62ref0310	-	diguanylate cyclase
-	st62ref0311	-	ATPase, partial
-	st62ref0312	-	Blr2286 protein
-	st62ref0313	-	LysR family transcriptional regulator
-	st62ref0314	-	Unknown
-	st62ref0315	-	amino acid transporter
-	st62ref0316	-	methyltransferase
-	st62ref0317	-	formate dehydrogenase
-	st62ref0318	-	type IV secretion protein Dot
-	st62ref0319	-	type IV secretion protein Dot
-	st62ref0320	-	Oxidoreductase, short chain dehydrogenase/reductase family
-	st62ref0321	-	Unknown
-	st62ref0322	-	Unknown
-	st62ref0323	-	Elongation factor P
-	st62ref0324	-	lysine 2,3-aminomutase
-	st62ref0325	-	Polyphosphate kinase
-	st62ref0326	-	Patatin
-	st62ref0327	-	Chromate transport protein
-	st62ref0328	-	Unknown
-	st62ref0329	-	acyl-CoA dehydrogenase
-	st62ref0330	-	Unknown
-	st62ref0331	-	mannose-1-phosphate guanylyltransferase
-	st62ref0332	-	Phosphotransferase
-	st62ref0333	-	LPS-assembly protein LptD
-	st62ref0334	-	Chaperone SurA
-	st62ref0335	-	4-hydroxythreonine-4-phosphate dehydrogenase
-	st62ref0336	-	Dihydrofolate reductase
-	st62ref0337	-	GH20307
-	st62ref0338	-	ORF16-lacZ fusion protein
-	st62ref0339	-	Elongation factor Tu 5
-	st62ref0340	-	Unknown
-	st62ref0341	-	Protein translocase subunit SecE
-	st62ref0342	-	Transcription termination/antitermination protein NusG
-	st62ref0343	-	50S ribosomal protein L11
-	st62ref0344	-	50S ribosomal protein L1
-	st62ref0345	-	Unknown
-	st62ref0346	-	50S ribosomal protein L10
-	st62ref0347	-	50S ribosomal protein L7/L12
-	st62ref0348	-	DNA-directed RNA polymerase subunit beta 2
-	st62ref0349	-	DNA-directed RNA polymerase subunit beta' 0
-	st62ref0350	-	30S ribosomal protein S12
-	st62ref0351	-	30S ribosomal protein S7
-	st62ref0352	-	Elongation factor G
-	st62ref0353	-	Elongation factor Tu 5
-	st62ref0354	-	Elongation factor Tu
-	st62ref0355	-	30S ribosomal protein S10
-	st62ref0356	-	50S ribosomal protein L3
-	st62ref0357	-	50S ribosomal protein L4
-	st62ref0358	-	50S ribosomal protein L23
-	st62ref0359	-	50S ribosomal protein L2
-	st62ref0360	-	30S ribosomal protein S19
-	st62ref0361	-	50S ribosomal protein L22
-	st62ref0362	-	30S ribosomal protein S3
-	st62ref0363	-	50S ribosomal protein L16
-	st62ref0364	-	50S ribosomal protein L29
-	st62ref0365	-	30S ribosomal protein S17
-	st62ref0366	-	50S ribosomal protein L14
-	st62ref0367	-	50S ribosomal protein L24
-	st62ref0368	-	50S ribosomal protein L5
-	st62ref0369	-	30S ribosomal protein S14
-	st62ref0370	-	30S ribosomal protein S8
-	st62ref0371	-	50S ribosomal protein L6
-	st62ref0372	-	50S ribosomal protein L18
-	st62ref0373	-	30S ribosomal protein S5
-	st62ref0374	-	50S ribosomal protein L30
-	st62ref0375	-	50S ribosomal protein L15
-	st62ref0376	-	Protein translocase subunit SecY
-	st62ref0377	-	30S ribosomal protein S13
-	st62ref0378	-	Unknown
-	st62ref0379	-	30S ribosomal protein S11
-	st62ref0380	-	30S ribosomal protein S4
-	st62ref0381	-	DNA-directed RNA polymerase subunit alpha
-	st62ref0382	-	50S ribosomal protein L17
-	st62ref0383	-	Single-stranded DNA-binding protein
-	st62ref0384	-	MFS transporter
-	st62ref0385	-	enoyl-ACP reductase
-	st62ref0386	-	Acyl carrier protein
-	st62ref0387	-	3-hydroxymyristoyl/3-hydroxydecanoyl-(Acyl carrier protein) dehydratase
-	st62ref0388	-	3-oxoacyl-[acyl-carrier-protein] synthase 2

## Sheet: Region 2
Genename	Gene Identifier	COG#	Annotation
-	st62ref0489	-	IcmF
-	st62ref0490	-	Component of the Dot/Icm secretion system
-	st62ref0491	-	Bifunctional purine biosynthesis protein PurH
-	st62ref0492	-	Unknown
-	st62ref0493	-	Ribosomal protein L11 methyltransferase
-	st62ref0494	-	Acetyl CoA carboxylase, biotin carboxylase subunit
-	st62ref0495	-	Acetyl CoA carboxylase, BCCP subunit
-	st62ref0496	-	3-dehydroquinate dehydratase
-	st62ref0497	-	Oxaloacetate decarboxylase alpha subunit
-	st62ref0498	-	Zinc metalloproteinase 7
-	st62ref0499	-	Lipase A
-	st62ref0500	-	endonuclease/exonuclease/phosphatase
-	st62ref0501	-	Unknown
-	st62ref0502	-	Fructose bisphosphate aldolase
-	st62ref0503	-	Phenol hydroxylase
-	st62ref0504	-	DotV membrane protein of dot/Icm type IV secretion system
-	st62ref0505	-	acetyltransferase
-	st62ref0506	-	CDP-diacylglycerol-serine-O-phosphatidyltransferase
-	st62ref0507	-	Phosphohistidinoprotein-hexose phosphotransferase component of N-regulated PTS system (Npr)
-	st62ref0508	-	Ribosome-associated, sigma 54 modulation protein
-	st62ref0509	-	RNA polymerase sigma-54 factor
-	st62ref0510	-	50S ribosomal protein L33
-	st62ref0511	-	50S ribosomal protein L28
-	st62ref0512	-	Transposase
-	st62ref0513	-	tRNA (guanine-N(7)-)-methyltransferase
-	st62ref0514	-	Endo-1,4 beta-glucanase
-	st62ref0515	-	ankyrin
-	st62ref0516	-	Modulator for HflB protease specific for phage lambda cII repressor
-	st62ref0517	-	Protein HflC
-	st62ref0518	-	Adenylosuccinate synthetase
-	st62ref0519	-	Unknown
-	st62ref0520	-	cupin
-	st62ref0521	-	Arginine repressor
-	st62ref0522	-	Amino acid (Glutamine) ABC transporter, periplasmic amino acid binding protein
-	st62ref0523	-	Amino acid (Glutamine) ABC transporter, permease
-	st62ref0524	-	Amino acid ABC transporter, ATP-binding protein
-	st62ref0525	-	Argininosuccinate synthase
-	st62ref0526	-	Argininosuccinate lyase
-	st62ref0527	-	Ornithine carbamoyltransferase
-	st62ref0528	-	adenosine deaminase
-	st62ref0529	-	Leucine-, isoleucine-, valine-, threonine-, and alanine-binding protein
-	st62ref0530	-	Carboxy-terminal protease
-	st62ref0531	-	Peptidase, M23/M37 family
-	st62ref0532	-	2,3-bisphosphoglycerate-independent phosphoglycerate mutase
-	st62ref0533	-	Unknown
-	st62ref0534	-	Unknown
-	st62ref0535	-	Phosphatidylcholine-hydrolyzing phospholipase C
-	st62ref0536	-	Ditrans,polycis-undecaprenyl-diphosphate synthase ((2E,6E)-farnesyl-diphosphate specific)
-	st62ref0537	-	Phosphatidate cytidylyltransferase
-	st62ref0538	-	Membrane associated zinc metalloprotease
-	st62ref0539	-	Unknown
-	st62ref0540	-	Outer membrane protein assembly factor BamA
-	st62ref0541	-	Outer membrane protein OmpH
-	st62ref0542	-	UDP-3-O-(3-hydroxymyristoyl) glucosamine N-acyltransferase
-	st62ref0543	-	Putative sugar transporter family
-	st62ref0544	-	3-hydroxyacyl-[acyl-carrier-protein] dehydratase FabZ
-	st62ref0545	-	Acyl-(Acyl carrier protein)-UDP-N-acetylglucosamine acyltransferase
-	st62ref0546	-	Putative fluoride ion transporter CrcB
-	st62ref0547	-	Serine--tRNA ligase
-	st62ref0548	-	GrpB domain protein
-	st62ref0549	-	Unknown
-	st62ref0550	-	phytanoyl-CoA dioxygenase
-	st62ref0551	-	methyltransferase
-	st62ref0552	-	D-xylose reductase III
-	st62ref0553	-	Unknown
-	st62ref0554	-	Unknown
-	st62ref0555	-	acetyltransferase
-	st62ref0556	-	Unknown
-	st62ref0557	-	Methyltransferase, ubiE/COQ5 family
-	st62ref0558	-	uridine kinase
-	st62ref0559	-	Acetyltransferase, GNAT family
-	st62ref0560	-	aminoglycoside phosphotransferase
-	st62ref0561	-	glutathione transferase
-	st62ref0562	-	Aminoglycoside N (6')-acetyltransferase
-	st62ref0563	-	Component of the Dot/Icm secretion system
-	st62ref0564	-	RDD family protein
-	st62ref0565	-	Signal transduction protein
-	st62ref0566	-	Unknown
-	st62ref0567	-	Succinate dehydrogenase, membrane subunit, binds cytochrome b556
-	st62ref0568	-	Succinate dehydrogenase, hydrophobic membrane anchor protein
-	st62ref0569	-	Succinate dehydrogenase, flavoprotein subunit
-	st62ref0570	-	Succinate dehydrogenase, FeS subunit
-	st62ref0571	-	2-oxoglutarate dehydrogenase E1 component
-	st62ref0572	-	Dihydrolipoyllysine-residue succinyltransferase component of 2-oxoglutarate dehydrogenase complex
-	st62ref0573	-	Succinyl-CoA ligase [ADP-forming] subunit beta
-	st62ref0574	-	Succinyl-CoA ligase [ADP-forming] subunit alpha
-	st62ref0575	-	Pyridoxine/pyridoxamine 5'-phosphate oxidase
-	st62ref0576	-	Transmission trait enhancer protein LetE
-	st62ref0577	-	Fe-S center protein
-	st62ref0578	-	Major facilitator family transporter
-	st62ref0579	-	Uncharacterized conserved secreted protein
-	st62ref0580	-	Global DNA-binding transcriptional dual regulator
-	st62ref0581	-	Ribose-phosphate pyrophosphokinase
-	st62ref0582	-	Unknown
-	st62ref0583	-	Unknown
-	st62ref0584	-	membrane protein
-	st62ref0585	-	Phosphopantetheine adenylyltransferase
-	st62ref0586	-	gamma-glutamyltransferase
-	st62ref0587	-	Oxidoreductase
-	st62ref0588	-	1-acyl-sn-glycerol-3-phosphate acetyltransferase
-	st62ref0589	-	Multidrug efflux system protein
-	st62ref0590	-	DNA polymerase IV
-	st62ref0591	-	Unknown
-	st62ref0592	-	Formamidopyrimidine-DNA glycosylase
-	st62ref0593	-	Unknown
-	st62ref0594	-	aminotransferase
-	st62ref0595	-	Unknown
-	st62ref0596	-	Acetyoacetyl CoA reductase
-	st62ref0597	-	Acetyoacetyl CoA reductase
-	st62ref0598	-	PHB/PHA accumulation regulator DNA-binding domain protein
-	st62ref0599	-	Phasin protein
-	st62ref0600	-	Putative ribosephosphate isomerase
-	st62ref0601	-	Spore maturation protein A
-	st62ref0602	-	Spore maturation protein B
-	st62ref0603	-	Peptidase, M23/M37 family
-	st62ref0604	-	Tyrosine--tRNA ligase
-	st62ref0605	-	Unknown
-	st62ref0606	-	Unknown
-	st62ref0607	-	Conserved protein
-	st62ref0608	-	Unknown
-	st62ref0609	-	Unknown
-	st62ref0610	-	carbonic anhydrase
-	st62ref0611	-	Glutathione reductase
-	st62ref0612	-	adenosine deaminase
-	st62ref0613	-	Unknown
-	st62ref0614	-	Unknown
-	st62ref0615	-	Phosphate transporter
-	st62ref0616	-	phosphate transport regulator
-	st62ref0617	-	type II/III secretion system protein
-	st62ref0618	-	UPF0301 protein LPC_2717
-	st62ref0619	-	Putative Holliday junction resolvase
-	st62ref0620	-	Aspartate carbamoyltransferase
-	st62ref0621	-	Unknown
-	st62ref0622	-	ATP-dependent protease
-	st62ref0623	-	Membrane fusogenic activity family protein
-	st62ref0624	-	Nitrogen regulatory P-II transcription regulator
-	st62ref0625	-	5-formyltetrahydrofolate cyclo-ligase
-	st62ref0626	-	Unknown
-	st62ref0627	-	Putative aminodeoxychorismate lyase
-	st62ref0628	-	membrane protein
-	st62ref0629	-	2-acylglycerophosphoethanolamine acyltransferase
-	st62ref0630	-	PF07386 family protein
-	st62ref0631	-	Unknown
-	st62ref0632	-	Poly-beta-hydroxybutyrate polymerase
-	st62ref0633	-	Rrf2 family transcriptional regulator
-	st62ref0634	-	Component of SufBCD complex 4
-	st62ref0635	-	ATP transporter, ABC binding component, ATP-binding protein
-	st62ref0636	-	ABC transporter, permease component
-	st62ref0637	-	Cysteine desulfurase
-	st62ref0638	-	Nitrogen fixation protein (Fe-S cluster formation) NifU
-	st62ref0639	-	Metal-sulfur cluster biosynthetic enzyme
-	st62ref0640	-	Lysyl-tRNA synthetase, class II
-	st62ref0641	-	SAM-dependent methyltransferase
-	st62ref0642	-	Alanyl tRNA synthetase
-	st62ref0643	-	Major facilitator family transporter
-	st62ref0644	-	Unknown
-	st62ref0645	-	Unknown
-	st62ref0646	-	Metal ion transporter
-	st62ref0647	-	Alcohol dehydrogenase (NADP-dependent, zinc-type)
-	st62ref0648	-	Unknown
-	st62ref0649	-	ferredoxin
-	st62ref0650	-	Peptide deformylase
-	st62ref0651	-	sodium:proton antiporter
-	st62ref0652	-	Putative glutamate--cysteine ligase 2-2
-	st62ref0653	-	CoA-binding protein
-	st62ref0654	-	NADPH-dependent 7-cyano-7-deazaguanine reductase
-	st62ref0655	-	Major outer membrane protein
-	st62ref0656	-	3-methyladenine DNA glycosylase
-	st62ref0657	-	Glyoxylase
-	st62ref0658	-	calpastatin
-	st62ref0659	-	SidA
-	st62ref0660	-	Transmembrane protein
-	st62ref0661	-	membrane protein
-	st62ref0662	-	Unknown
-	st62ref0663	-	Predicted protein
-	st62ref0664	-	Expressed protein
-	st62ref0665	-	DNA uptake/competence protein ComA
-	st62ref0666	-	Type IV pilin 7
-	st62ref0667	-	Type IV fimbrial biogenesis PilY1-related protein
-	st62ref0668	-	Tfp pilus assembly protein PilX
-	st62ref0669	-	Type IV fimbrial biogenesis PilW related protein, transmembrane
-	st62ref0670	-	Type IV fimbrial biogenesis protein PilV
-	st62ref0671	-	Type IV pre-pilin
-	st62ref0672	-	Polysaccharide deacetylase
-	st62ref0673	-	Unknown
-	st62ref0674	-	Melitin resistance protein
-	st62ref0675	-	Thymidine kinase
-	st62ref0676	-	MFS transporter
-	st62ref0677	-	Major facilitator family transporter
-	st62ref0678	-	Phosphopentomutase
-	st62ref0679	-	ATP-dependent protease subunit HslV
-	st62ref0680	-	ATP-dependent protease ATPase subunit HslU
-	st62ref0681	-	type IV secretion protein Dot
-	st62ref0682	-	UPF0761 membrane protein LPC_2650
-	st62ref0683	-	Unknown
-	st62ref0684	-	Structural toxin protein RtxA
-	st62ref0685	-	Structural toxin protein RtxA
-	st62ref0686	-	Trp repressor binding protein
-	st62ref0687	-	ATP-dependent helicase HrpA
-	st62ref0688	-	Exodeoxyribonuclease III
-	st62ref0689	-	Exodeoxyribonuclease III
-	st62ref0690	-	50S ribosomal protein L31
-	st62ref0691	-	Malate dehydrogenase (Oxaloacetate-decarboxylating) (NADP(+))
-	st62ref0692	-	Unknown
-	st62ref0693	-	Major facilitator family transporter
-	st62ref0694	-	Major facilitator family transporter
-	st62ref0695	-	DNA adenine methylase
-	st62ref0696	-	Tryptophan/tyrosine permease
-	st62ref0697	-	tryptophan/tyrosine permease
-	st62ref0698	-	Outer membrane protein, OmpA family protein
-	st62ref0699	-	peptidase C39
-	st62ref0700	-	HlyD family secretion protein
-	st62ref0701	-	ABC transporter ElsE
-	st62ref0702	-	ABC transporter permease
-	st62ref0703	-	ABC transporter permease protein
-	st62ref0704	-	RND efflux system, outer membrane lipoprotein, NodT family
-	st62ref0705	-	Soluble lytic murein transglycosylase
-	st62ref0706	-	Ribulose-phosphate 3-epimerase
-	st62ref0707	-	Unknown
-	st62ref0708	-	membrane protein
-	st62ref0709	-	Conserved hypothethical protein
-	st62ref0710	-	PF05114 family protein
-	st62ref0711	-	Probable signal peptide protein
-	st62ref0712	-	Predicted esterase of the alpha-beta hydrolase superfamily
-	st62ref0713	-	NADH dehydrogenase transmembrane protein
-	st62ref0714	-	Acetoacetate decarboxylase
-	st62ref0715	-	Signal peptide protein
-	st62ref0716	-	Adenylate cyclase
-	st62ref0717	-	Conserved hypothethical protein
-	st62ref0718	-	UPF0276 protein GEM_5494
-	st62ref0719	-	Unknown
-	st62ref0720	-	Arginine ABC transporter, periplasmic binding protein
-	st62ref0721	-	Adenylyl transferase
-	st62ref0722	-	Dipeptidyl aminopeptidase/acylaminoacyl peptidase
-	st62ref0723	-	Lipoprotein
-	st62ref0724	-	ABC transporter ATP-binding protein
-	st62ref0725	-	membrane protein
-	st62ref0726	-	Ribosomal protein S12 methylthiotransferase RimO
-	st62ref0727	-	Thiol:disulfide interchange protein DsbD
-	st62ref0728	-	10 kDa chaperonin
-	st62ref0729	-	60 kDa chaperonin 0
-	st62ref0730	-	DNA binding stress protein
-	st62ref0731	-	spermidine synthase
-	st62ref0732	-	DNA topoisomerase 4 subunit B
-	st62ref0733	-	ABC dipeptide/oligopeptide/nickel transport, ATPase component
-	st62ref0734	-	Outer membrane protein
-	st62ref0735	-	LigA, interaptin
-	st62ref0736	-	Proline--tRNA ligase
-	st62ref0737	-	Phosphocholine transferase AnkX
-	st62ref0738	-	Phosphocholine hydrolase Lem3
-	st62ref0739	-	Sulfate transporter
-	st62ref0740	-	Unknown
-	st62ref0741	-	tRNA 2-thiocytidine biosynthesis protein TtcA
-	st62ref0742	-	Outer membrane protein TolC
-	st62ref0743	-	Protein-L-isoaspartate-O-methyltransferase
-	st62ref0744	-	2-amino-3-ketobutyrate coenzyme A ligase
-	st62ref0745	-	L-threonine 3-dehydrogenase
-	st62ref0746	-	ABC transporter, ABC binding protein
-	st62ref0747	-	enhanced entry protein EnhA
-	st62ref0748	-	Putative transporter component
-	st62ref0749	-	Transporter component
-	st62ref0750	-	(Outer) membrane protein
-	st62ref0751	-	type IV secretion protein IcmL
-	st62ref0752	-	Formimidoylglutamase
-	st62ref0753	-	Sepiapterin reductase
-	st62ref0754	-	Imidazolonepropionase
-	st62ref0755	-	1,4-beta-xylanase
-	st62ref0756	-	peptide transporter
-	st62ref0757	-	Sensor histidine kinase
-	st62ref0758	-	Two component response regulator
-	st62ref0759	-	Unknown
-	st62ref0760	-	NB-ARC domain-containing protein,TIR-like domain-containing protein (DUF1863)
-	st62ref0761	-	Proton/sodium-glutamate symport protein
-	st62ref0762	-	Valine--tRNA ligase
-	st62ref0763	-	Multidrug resistance protein
-	st62ref0764	-	Efflux transporter, RND family, MFP subunit
-	st62ref0765	-	Unknown
-	st62ref0766	-	Unknown
-	st62ref0767	-	transporter
-	st62ref0768	-	Serine hydroxymethyltransferase
-	st62ref0769	-	Transcriptional repressor NrdR
-	st62ref0770	-	N utilization substance protein B homolog
-	st62ref0771	-	Thiamine-monophosphate kinase
-	st62ref0772	-	Phosphatidylglycerophosphatase A
-	st62ref0773	-	Transmembrane permease
-	st62ref0774	-	Putative outer membrane protein
-	st62ref0775	-	Putative outer membrane protein
-	st62ref0776	-	Unknown
-	st62ref0777	-	Glutamine dependent NAD+ synthetase
-	st62ref0778	-	DNA helicase, SNF2/RAD54 family domain protein
-	st62ref0779	-	signal peptide protein
-	st62ref0780	-	Replicative DNA helicase
-	st62ref0781	-	Alanine racemase
-	st62ref0782	-	17 kDa surface antigen
-	st62ref0783	-	Putative signal-transduction protein containing cAMP-binding and CBS domains
-	st62ref0784	-	membrane protein
-	st62ref0785	-	Glutamate synthetase
-	st62ref0786	-	GGDEF domain protein
-	st62ref0787	-	Lipoyl synthase
-	st62ref0788	-	Predicted endonuclease containing a URI domain
-	st62ref0789	-	Di/tripeptide transporter homolog IraB
-	st62ref0790	-	Small-molecule methyltransferase IraA
-	st62ref0791	-	LPS biosynthesis protein, PseA-like protein
-	st62ref0792	-	Imidazole glycerol phosphate synthase subunit HisF
-	st62ref0793	-	Imidazole glycerol phosphate synthase subunit HisH 1
-	st62ref0794	-	CMP-N,N'-diacetyllegionaminic acid synthase 4
-	st62ref0795	-	N,N'-diacetyllegionaminic acid synthase 4
-	st62ref0796	-	UDP-N,N'-diacetylbacillosamine 2-epimerase (hydrolyzing)
-	st62ref0797	-	Chloramphenicol acetyltransferase
-	st62ref0798	-	Pyridoxal phosphate-dependent enzyme apparently involved in regulation of cell wall biosynthesis
-	st62ref0799	-	dTDP-6-deoxy-D-glucose-3,5-epimerase RmlC
-	st62ref0800	-	dTDP-6-deoxy-L-mannose dehydrogenase RmlD
-	st62ref0801	-	dTDP-glucose 4,6-dehydratase
-	st62ref0802	-	Glucose-6-phosphate isomerase
-	st62ref0803	-	Glucose-1-phosphate thymidylyltransferase
-	st62ref0804	-	NAD dependent epimerase/dehydratase, UDP-glucose-4-epimerase
-	st62ref0805	-	O-antigen initiating glycosyl transferase group 4-UDP-N-acetylmuramyl pentapeptide phosphotransferase/(N-acetylgalactosaminyl transferase TrsF)
-	st62ref0806	-	Surface adhesion protein
-	st62ref0807	-	Unknown
-	st62ref0808	-	Unknown
-	st62ref0809	-	Spore coat polysaccharide biosynthesis protein E (NeuB)
-	st62ref0810	-	methyltransferase
-	st62ref0811	-	Unknown
-	st62ref0812	-	Unknown
-	st62ref0813	-	Unknown
-	st62ref0814	-	Transport permease protein
-	st62ref0815	-	ABC transporter of LPS O-antigen
-	st62ref0816	-	Unknown
-	st62ref0817	-	O-acetyltransferase
-	st62ref0818	-	Glycosyl transferase
-	st62ref0819	-	glycosyl transferase
-	st62ref0820	-	Metallo-beta-lactamase family protein
-	st62ref0821	-	Unknown
-	st62ref0822	-	Carbon storage regulator homolog
-	st62ref0823	-	O-antigen acetylase
-	st62ref0824	-	Biotin-[acetylCoA carboxylase] holoenzyme synthetase and biotin operon repressor

## Sheet: Region 3
Genename	Gene Identifier	COG#	Annotation
-	st62ref0878	-	Arabinose 5-phosphate isomerase
-	st62ref0879	-	Toluene transporter subunit: ATP-binding component of ABC superfamily
-	st62ref0880	-	Toluene transporter subunit: membrane component of ABC superfamily
-	st62ref0881	-	Toluene tolerance protein Ttg2C
-	st62ref0882	-	Toluene tolerance protein
-	st62ref0883	-	anti-anti-sigma factor
-	st62ref0884	-	BolA family transcriptional regulator
-	st62ref0885	-	UDP-N-acetylglucosamine 1-carboxyvinyltransferase 2
-	st62ref0886	-	Putative GTP cyclohydrolase 1 type 2
-	st62ref0887	-	Outer membrane-specific lipoprotein transporter subunit ATP-binding component of ABC superfamily
-	st62ref0888	-	ABC transporter, permease protein
-	st62ref0889	-	Membrane fusion protein
-	st62ref0890	-	Carbohydrate-binding WSC
-	st62ref0891	-	Transcriptional regulator FleQ
-	st62ref0892	-	Unknown
-	st62ref0893	-	Signal peptide peptidase SppA (Protease IV)
-	st62ref0894	-	Cytochrome c biogenesis ATP-binding export protein CcmA
-	st62ref0895	-	Heme exporter protein B
-	st62ref0896	-	Unknown
-	st62ref0897	-	Heme exporter subunit membrane component of ABC superfamily
-	st62ref0898	-	Heme exporter protein CcmD
-	st62ref0899	-	Cytochrome c-type biogenesis protein CcmE
-	st62ref0900	-	Heme lyase, CcmF subunit
-	st62ref0901	-	Periplasmic thioredoxin of cytochrome c-type biogenesis
-	st62ref0902	-	Heme lyase, CcmH subunit
-	st62ref0903	-	Cytochrome c type biogenesis protein CcmH
-	st62ref0904	-	Protein with a Dodecin-like topology
-	st62ref0905	-	Cytochrome c type biogenesis protein CycH
-	st62ref0906	-	Putative 3-methyladenine DNA glycosylase
-	st62ref0907	-	ATP-dependent DNA helicase
-	st62ref0908	-	Isobutyryl-CoA dehydrogenase, mitochondrial (Acyl-CoA dehydrogenase family member 8) (ACAD-8)
-	st62ref0909	-	3-hydroxyisobutyryl Coenzyme A hydrolase
-	st62ref0910	-	3-hydroxyisobutyryl-CoA hydrolase, mitochondrial (3-hydroxyisobutyryl-coenzyme A hydrolase) (HIBYL-CoA-H) (HIB-CoA hydrolase)
-	st62ref0911	-	Unknown
-	st62ref0912	-	Unknown
-	st62ref0913	-	Unknown
-	st62ref0914	-	Peptide chain release factor 3 3
-	st62ref0915	-	Unknown
-	st62ref0916	-	NAD(P) transhydrogenase subunit beta
-	st62ref0917	-	Pyridine nucleotide transhydrogenase, alpha subunit (Part 2)
-	st62ref0918	-	NAD(P) transhydrogenase subunit alpha
-	st62ref0919	-	transporter
-	st62ref0920	-	Unknown
-	st62ref0921	-	Two component response regulator with GGDEF domain
-	st62ref0922	-	Unknown
-	st62ref0923	-	Unknown
-	st62ref0924	-	Unknown
-	st62ref0925	-	Unknown
-	st62ref0926	-	Glycosyl hydrolase
-	st62ref0927	-	Sodium:dicarboxylate symporter
-	st62ref0928	-	Succinyl-diaminopimelate desuccinylase
-	st62ref0929	-	2,3,4,5-tetrahydropyridine-2,6-dicarboxylate N-succinyltransferase
-	st62ref0930	-	acyltransferase
-	st62ref0931	-	Cystathionine gamma-synthase, PLP-dependent
-	st62ref0932	-	Sensory box protein/GGDEF/EAL domains
-	st62ref0933	-	Unknown
-	st62ref0934	-	Kynurenine 3-monooxygenase
-	st62ref0935	-	All0326 protein
-	st62ref0936	-	Cytokinin oxidase
-	st62ref0937	-	general secretion pathway protein GspC
-	st62ref0938	-	Sel1 repeat protein
-	st62ref0939	-	Na/Ca antiporter
-	st62ref0940	-	Substrate of the Dot/Icm secretion system
-	st62ref0941	-	A/G specific adenine glycosylase
-	st62ref0942	-	asmA protein
-	st62ref0943	-	Unknown
-	st62ref0944	-	Unknown
-	st62ref0945	-	Unknown
-	st62ref0946	-	Tryptophan synthase beta chain like protein
-	st62ref0947	-	DegP protease (Do-like, S2-serine-like)
-	st62ref0948	-	Hydrolase, isochorismatase family
-	st62ref0949	-	3-hydroxyacyl-CoA dehydrogenase type-2 (3-hydroxyacyl-CoA dehydrogenase type II) (Type II HADH) (3-hydroxy-2-methylbutyryl-CoA dehydrogenase)
-	st62ref0950	-	Flagellar biosynthesis/type III secretory pathway chaperone
-	st62ref0951	-	Negative regulator of flagellin synthesis
-	st62ref0952	-	Flagella basal body P-ring formation protein FlgA
-	st62ref0953	-	Cytochrome c5
-	st62ref0954	-	Enhanced entry protein EnhA
-	st62ref0955	-	Unknown
-	st62ref0956	-	Type III pantothenate kinase
-	st62ref0957	-	Transcriptional regulator MraZ
-	st62ref0958	-	Ribosomal RNA small subunit methyltransferase H
-	st62ref0959	-	Cell division protein FtsL
-	st62ref0960	-	Penicillin binding protein 3
-	st62ref0961	-	UDP-N-acetylmuramoyl-L-alanyl-D-glutamate--2,6-diaminopimelate ligase
-	st62ref0962	-	Erythronate-4-phosphate dehydrogenase
-	st62ref0963	-	Transmembrane protein
-	st62ref0964	-	Phosphatidylglycerophosphatase B
-	st62ref0965	-	Unknown
-	st62ref0966	-	Electron transfer flavoprotein beta-subunit (Beta-ETF)
-	st62ref0967	-	Electron transfer flavoprotein, alpha subunit
-	st62ref0968	-	Alanine dehydrogenase
-	st62ref0969	-	Penicillin-binding protein 1A
-	st62ref0970	-	Unknown
-	st62ref0971	-	Tfp pilus assembly protein, ATPase PilM
-	st62ref0972	-	Type IV pilus biogenesis protein PilN

## Sheet: Region 4
Genename	Gene Identifier	COG#	Annotation
-	st62ref1262	-	Transmembrane Tfp pilus assembly protein FimV (Twitching motility)
-	st62ref1263	-	Integral membrane protein
-	st62ref1264	-	oxidoreductase
-	st62ref1265	-	tRNA pseudouridine synthase A
-	st62ref1266	-	N-(5'-phosphoribosyl)anthranilate isomerase
-	st62ref1267	-	Tryptophan synthase beta chain
-	st62ref1268	-	Tryptophan synthase alpha chain
-	st62ref1269	-	Glutamine--tRNA ligase
-	st62ref1270	-	Cysteine--tRNA ligase
-	st62ref1271	-	Sulfatase domain protein
-	st62ref1272	-	Unknown
-	st62ref1273	-	Type II protein secretion ATPase LspE
-	st62ref1274	-	Type II protein secretion LspD
-	st62ref1275	-	Oxidoreductase
-	st62ref1276	-	Adenylate cyclase 1 protein
-	st62ref1277	-	Drug resistance transporter, Bcr/CflA
-	st62ref1278	-	MFS transporter
-	st62ref1279	-	Siderophore biosynthetic enzyme FrgA
-	st62ref1280	-	Protein LbtB

## Sheet: Region 5
Genename	Gene Identifier	COG#	Annotation
-	st62ref1412	-	Lipase A
-	st62ref1413	-	Unknown
-	st62ref1414	-	Multidrug efflux protein
-	st62ref1415	-	Phospholipase C
-	st62ref1416	-	23S rRNA (uracil(1939)-C(5))-methyltransferase RlmD
-	st62ref1417	-	GTP pyrophosphokinase ((P)ppGpp synthetase I) stringent stress response RelA
-	st62ref1418	-	Membrane protein
-	st62ref1419	-	Aspartate aminotransferase
-	st62ref1420	-	Regulatory protein
-	st62ref1421	-	Single stranded DNA specific exonuclease RecJ
-	st62ref1422	-	tRNA-dihydrouridine synthase
-	st62ref1423	-	Protein translocase subunit SecA

## Sheet: Region 6
Genename	Gene Identifier	COG#	Annotation
-	st62ref1672	-	SOS mutagenesis and repair UmuC protein
-	st62ref1673	-	SOS (Error prone) mutagenesis protein UmuD (RumA)
-	st62ref1674	-	carboxypeptidase
-	st62ref1675	-	Arginine N-succinyltransferase, beta chain
-	st62ref1676	-	N-succinylglutamate 5-semialdehyde dehydrogenase
-	st62ref1677	-	N-succinylarginine dihydrolase
-	st62ref1678	-	Spermidine synthase
-	st62ref1679	-	cytochrome C
-	st62ref1680	-	Ribosome-recycling factor
-	st62ref1681	-	Uridylate kinase
-	st62ref1682	-	Elongation factor Ts
-	st62ref1683	-	30S ribosomal protein S2
-	st62ref1684	-	Envelope stress induced periplasmic protein
-	st62ref1685	-	permease, partial
-	st62ref1686	-	Protein containing SET domain
-	st62ref1687	-	Methionine aminopeptidase
-	st62ref1688	-	Bifunctional uridylyltransferase/uridylyl-removing enzyme
-	st62ref1689	-	tRNA-specific adenosine deaminase
-	st62ref1690	-	GMP synthase [glutamine-hydrolyzing]
-	st62ref1691	-	Inosine-5'-monophosphate dehydrogenase
-	st62ref1692	-	Site-determining protein
-	st62ref1693	-	Cell division topological specificity factor
-	st62ref1694	-	acyl-CoA dehydrogenase
-	st62ref1695	-	hydrolase
-	st62ref1696	-	Unknown
-	st62ref1697	-	glycerol-3-phosphate ABC transporter ATP-binding protein
-	st62ref1698	-	glycerol-3-phosphate transporter membrane protein
-	st62ref1699	-	glycerol-3-phosphate transporter permease
-	st62ref1700	-	quinone oxidoreductase
-	st62ref1701	-	chloride channel protein
-	st62ref1702	-	Anthranilate synthase
-	st62ref1703	-	Aspartyl/glutamyl-tRNA(Asn/Gln) amidotransferase subunit C
-	st62ref1704	-	Glutamyl-tRNA(Gln) amidotransferase subunit A
-	st62ref1705	-	Aspartyl/glutamyl-tRNA(Asn/Gln) amidotransferase subunit B
-	st62ref1706	-	Unknown
-	st62ref1707	-	Adenylate/guanylate cyclase transmembrane protein
-	st62ref1708	-	Unknown
-	st62ref1709	-	Protein containing tetratricopeptide repeat
-	st62ref1710	-	DNA-binding protein fis
-	st62ref1711	-	Unknown
-	st62ref1712	-	heme biosynthesis protein HemY
-	st62ref1713	-	nitrogen fixation protein NifU
-	st62ref1714	-	Cysteine desulfurase NifS
-	st62ref1715	-	tRNA (cytidine/uridine-2''''-O-)-methyltransferase
-	st62ref1716	-	Inositol monophosphatase
-	st62ref1717	-	signal peptide peptidase SppA
-	st62ref1718	-	Endopeptidase Clp ATP-binding chain B (ClpB)
-	st62ref1719	-	Unknown

## Sheet: Region 7
Genename	Gene Identifier	COG#	Annotation
-	st62ref2232	-	Sterol desaturase
-	st62ref2233	-	Nitric oxide reductase, subunit B
-	st62ref2234	-	Multidrug resistance ABC transporter ATP-binding protein (Fused permease/ATPase domains)
-	st62ref2235	-	membrane protein
-	st62ref2236	-	Unknown
-	st62ref2237	-	peptidase S9
-	st62ref2238	-	GTP cyclohydrolase II, riboflavin biosynthesis
-	st62ref2239	-	Unknown
-	st62ref2240	-	uracil phosphoribosyltransferase
-	st62ref2241	-	Uracil phosphoribosyltransferase
-	st62ref2242	-	Unknown
-	st62ref2243	-	Unknown
-	st62ref2244	-	C4-dicarboxylate transport protein
-	st62ref2245	-	Unknown
-	st62ref2246	-	Unknown
-	st62ref2247	-	DedA family protein
-	st62ref2248	-	type IV secretion protein Dot
-	st62ref2249	-	glutamine amidotransferase
-	st62ref2250	-	alcohol dehydrogenase
-	st62ref2251	-	aldehyde dehydrogenase
-	st62ref2252	-	glutamine synthetase
-	st62ref2253	-	Dihydroxy-acid dehydratase
-	st62ref2254	-	UPF0276 protein lp12_2246
-	st62ref2255	-	membrane protein
-	st62ref2256	-	Metallo-beta-lactamase superfamily protein
-	st62ref2257	-	Unknown
-	st62ref2258	-	Putative membrane protein
-	st62ref2259	-	Phospholipid-binding domain-containing protein
-	st62ref2260	-	PHA synthase
-	st62ref2261	-	bifunctional enoyl-CoA hydratase/phosphate acetyltransferase
-	st62ref2262	-	Acetate kinase
-	st62ref2263	-	cytochrome C biogenesis protein
-	st62ref2264	-	molecular chaperone
-	st62ref2265	-	acyltransferase
-	st62ref2266	-	Lipoprotein signal peptidase
-	st62ref2267	-	Prolidase
-	st62ref2268	-	Putative membrane protein
-	st62ref2269	-	RecB family transporter exonuclease 5
-	st62ref2270	-	oxidoreductase
-	st62ref2271	-	Unknown
-	st62ref2272	-	Transmembrane protein
-	st62ref2273	-	glycerol-3-phosphate ABC transporter substrate-binding protein
-	st62ref2274	-	glycerophosphodiester phosphodiesterase
-	st62ref2275	-	Hypothetical conserved protein
-	st62ref2276	-	amino acid dehydrogenase
-	st62ref2277	-	SAM-dependent methyltransferase
-	st62ref2278	-	4-hydroxyphenylpyruvate dioxygenase
-	st62ref2279	-	2-keto-4-pentenoate hydratase
-	st62ref2280	-	Glutathione S-transferase
-	st62ref2281	-	Unknown
-	st62ref2282	-	Asparagine--tRNA ligase
-	st62ref2283	-	Unknown
-	st62ref2284	-	Lipoprotein-releasing system ATP-binding protein LolD
-	st62ref2285	-	Lipoprotein ABC transporter
-	st62ref2286	-	CDP-diacylglycerol--glycerol-3-phosphate 3-phosphatidyltransferase
-	st62ref2287	-	HAD family hydrolase
-	st62ref2288	-	Pseudouridine synthase
-	st62ref2289	-	Ribonuclease E
-	st62ref2290	-	Weakly similar to eukaryotic proteins, coiled coil domain and putative eukaryotic bZIP transcription factor domain
-	st62ref2291	-	RNA polymerase-associated protein RapA

## Sheet: Region 8
Genename	Gene Identifier	COG#	Annotation
-	st62ref2358	-	RNA polymerase sigma factor RpoD 6
-	st62ref2359	-	integrase
-	st62ref2360	-	Putative DNA repair endonuclease
-	st62ref2361	-	Unknown
-	st62ref2362	-	Putative tetrapyrrole (Corrin/Porphyrin) methylase
-	st62ref2363	-	Unknown
-	st62ref2364	-	transporter
-	st62ref2365	-	Unknown
-	st62ref2366	-	Putative prophage regulatory protein
-	st62ref2367	-	Putative type I restriction-modification system (N6 DNA methylase)
-	st62ref2368	-	Putative type I restriction-modification system (Methylase_S)
-	st62ref2369	-	Putative type-1 restriction system, restriction subunit
-	st62ref2370	-	ATP-dependent OLD family endonuclease
-	st62ref2371	-	Putative metallophosphoesterase
-	st62ref2372	-	SMC domain-containing protein
-	st62ref2373	-	Putative phage repressor
-	st62ref2374	-	Legionella vir region protein
-	st62ref2375	-	LvrB homolog
-	st62ref2376	-	Global regulator
-	st62ref2377	-	LvhB11
-	st62ref2378	-	Putative conjugal transfer protein TrbC
-	st62ref2379	-	Conjugal transfer protein trbD
-	st62ref2380	-	Conjugal transfer protein trbE
-	st62ref2381	-	Conjugal transfer protein trbF
-	st62ref2382	-	Conjugal transfer protein trbG
-	st62ref2383	-	Putative conjugal transfer TrbH protein
-	st62ref2384	-	Conjugal transfer protein trbI
-	st62ref2385	-	Conjugal transfer protein trbJ
-	st62ref2386	-	Unknown
-	st62ref2387	-	Putative conjugal transfer protein trbL
-	st62ref2388	-	Conjugal transfer protein traG
-	st62ref2389	-	Conjugal transfer protein traF
-	st62ref2390	-	TraD protein
-	st62ref2391	-	MULTISPECIES: DNA primase
-	st62ref2392	-	Unknown
-	st62ref2393	-	TraI protein
-	st62ref2394	-	conjugal transfer protein TrbJ
-	st62ref2395	-	conjugal transfer protein TraK
-	st62ref2396	-	TraL protein 0
-	st62ref2397	-	conjugal transfer protein TraM
-	st62ref2398	-	PF11074 domain protein
-	st62ref2399	-	Marine sediment metagenome DNA, contig: S01H1_L04828
-	st62ref2400	-	DNA helicase

## Sheet: Region 9
Genename	Gene Identifier	COG#	Annotation
-	st62ref2629	-	Unknown
-	st62ref2630	-	Glutaryl CoA dehydrogenase
-	st62ref2631	-	2-oxoisovalerate dehydrogenase, E1 component, alpha and beta fusion
-	st62ref2632	-	FlhB domain protein
